# Supplementary material
Source: MDPI journal article supplement (https://www.mdpi.com/2673-9410/3/4/28)
Supplement: s1 [file s1]

## Supplementary material

**Table S1.** Temperature-dependent maximum growth rate

| Equation                                                                                      | Constant                                                                                                                                                                | Reference                                                                                  |
|-----------------------------------------------------------------------------------------------|-------------------------------------------------------------------------------------------------------------------------------------------------------------------------|--------------------------------------------------------------------------------------------|
| $\mu_T = \mu_0 \times e^{r_\mu \times T}$                                                     | $\mu_0$ (1/d) is the specific growth rate at 0°C; $r_\mu$ (1/°C) is the rate constant representing the sensitivity of the maximum growth rate to changes in temperature | Collins and Boylen [58]; Arrigo and Sullivan [59]; Moisan et al. [60]                      |
| $\mu_T = a \times T^b + c$                                                                    |                                                                                                                                                                         | Montagnes et al. [61]                                                                      |
| $\mu_T = \mu_{20} \times \theta^{T-20}$                                                       | $\mu_{20}$ is the growth rate at (20 °C)                                                                                                                                | Haario et al. [62]; Pegallapati and Nirmalakhandan [63]; Ketheesan and Nirmalakhandan [64] |
| $\mu_T = a \times e^{-\frac{E_a}{k \times T}}$                                                | $E_a$ being the activation energy for microalgae growth (J); $k$ is the Boltzmann constant ( $1.380649 \times 10^{-23}$ J/K); and $T$ is the temperature (K).           | Bordel et al. [65]                                                                         |
| $f(T) = a \times e^{b \times T} \times \left[ 1 - \left( \frac{T - z}{w/2} \right)^2 \right]$ | $z$ (°C) is the maximum of the quadratic portion of the function; and $w$ (°C) is the range over which the growth is positive (i.e. thermal breadth)                    | Bernhardt et al. [66]; Thomas et al. [67]                                                  |

**Table S2.** Temperature factor

| Equation                                                                                                                                                                                                                                                                                                                                    | Constant                                                                                                                                                                                                                                         | Reference                                                           |
|---------------------------------------------------------------------------------------------------------------------------------------------------------------------------------------------------------------------------------------------------------------------------------------------------------------------------------------------|--------------------------------------------------------------------------------------------------------------------------------------------------------------------------------------------------------------------------------------------------|---------------------------------------------------------------------|
| $f(T) = \begin{cases} e^{-k_1^T \times (T-T_1)^2} & \text{for } T \leq T_1 \\ 1 & \text{for } T_1 < T \leq T_2 \\ e^{-k_2^T \times (T_2-T)^2} & \text{for } T > T_2 \end{cases}$                                                                                                                                                            | $T_1$ is the lower optimal growth temperature; $T_2$ is the upper optimal growth temperature; $k_1^T$ is the temperature effect below the optimal growth temperature; and $k_2^T$ is the temperature effect above the optimal growth temperature | Cossins and Bowler [68]; James et al. [69]; Gharagozloo et al. [26] |
| $f(T) = \begin{cases} e^{-k_1 \times (T-T_{opt})^2} & \text{for } T \leq T_{opt} \\ e^{-k_2 \times (T-T_{opt})^2} & \text{for } T > T_{opt} \end{cases}$                                                                                                                                                                                    | $T_{opt}$ is the optimum temperature; $k_1$ is the temperature effect below the optimum temperature; and $k_2$ is the temperature effect above the optimum temperature                                                                           | Cerco and Cole [25,70]                                              |
| $f(T) = \frac{a_T}{b_T \times \sqrt{2 \times \pi}} \times e^{-\frac{1}{2} \times \left(\frac{T-T_0}{b_T}\right)^2}$                                                                                                                                                                                                                         | $T_0$ is the optimum temperature                                                                                                                                                                                                                 | Dudley et al. [28]                                                  |
| $f(T) = \begin{cases} 0 & \text{for } T < T_{min} \\ \frac{(T - T_{max}) \times (T - T_{min})^2}{(T_{opt} - T_{min}) \times (a(T) - b(T))} & \text{for } T_{min} < T < T_{max} \\ 0 & \text{for } T > T_{max} \end{cases}$ $a(T) = (T_{opt} - T_{min}) \times (T - T_{opt})$ $b(T) = (T - T_{opt}) \times (T_{opt} + T_{min} - 2 \times T)$ | $T_{min}$ is the temperature below which no growth takes place; $T_{max}$ is the maximum temperature limit for growth; $T_{opt}$ is the optimum temperature                                                                                      | Bernard and Remond [32]                                             |
| $f(T) = \begin{cases} e^{-2.3 \times \left(\frac{T-T_{opt}}{T_L-T_{opt}}\right)^2} & \text{for } T < T_{opt} \\ e^{-2.3 \times \left(\frac{T-T_{opt}}{T_U-T_{opt}}\right)^2} & \text{for } T > T_{opt} \end{cases}$                                                                                                                         | $T_{opt}$ is the optimum temperature; and $T_L$ and $T_U$ are the lower and upper limits at 10% of the maximal growth rate.                                                                                                                      | Dauta et al. [71]; Martins et al. [72]                              |
| $f(T) = \frac{e^{-\frac{E_a}{R \times T}}}{1 + K \times e^{-\frac{E_b}{R \times T}}}$                                                                                                                                                                                                                                                       | $E_a$ is the activation energy required by enzymes to support metabolism; $E_b$ is the activation energy for enzyme denaturation; $R$ is the universal gas constant; and $K$ is the dimensionless inactivation constant.                         | Tevatia et al. [73]                                                 |
| $f(T) = 1 - \left(\frac{T - T_{opt}}{T_{max} - T_{min}}\right)^2$                                                                                                                                                                                                                                                                           | $T_{opt}$ , $T_{min}$ , and $T_{max}$ are the optimum, minimum, and maximum temperatures of the temperature tolerance range                                                                                                                      | Guterman et al. [74]                                                |
| $f(T) = c_1 \times e^{-c_2 \times  T - T_{opt} }$                                                                                                                                                                                                                                                                                           | $T_{opt}$ is the optimum temperature                                                                                                                                                                                                             | Chen et al. [75]                                                    |

|                                                                                                                                                                                                                                                                                                                        |                                                                                                                                                                                                                                                      |                                                     |
|------------------------------------------------------------------------------------------------------------------------------------------------------------------------------------------------------------------------------------------------------------------------------------------------------------------------|------------------------------------------------------------------------------------------------------------------------------------------------------------------------------------------------------------------------------------------------------|-----------------------------------------------------|
| $f(T) = \frac{T - T_{min}}{T_{ref} - T_{min}}$                                                                                                                                                                                                                                                                         | $T_{ref}$ is the baseline reference temperature; and $T_{min}$ is the minimum temperature                                                                                                                                                            | Chen et al. [75]; Di Toro et al. [76]; Ahlgren [77] |
| $f(T) = \frac{T}{M_T + T}$                                                                                                                                                                                                                                                                                             | $M_T$ is the half-saturation constant for temperature                                                                                                                                                                                                | Chen et al. [75]; Di Tor et al. [76]                |
| $f(T) = k \times \theta^{T-T_{ref}}$                                                                                                                                                                                                                                                                                   | $K$ is the coefficient at $T=T_{ref}$ ; and $\theta$ is the temperature coefficient                                                                                                                                                                  | Haario et al. [62]; Chen et al. [75]                |
| $f(T) = \left( \frac{T_{max} - T}{T_{max} - T_{opt}} \right)^\beta \times e^{-\beta \times \left( 1 - \frac{T_{max} - T}{T_{max} - T_{opt}} \right)}$                                                                                                                                                                  | $T_{max}$ is the maximum concentration above which the growth does not take place; $T_{opt}$ is the optimum temperature                                                                                                                              | Blanchard et al. [78]; Slegers et al. [79]          |
| $f(T) = \frac{2 \times e^{\frac{E_a}{R \times T_{opt}} - \frac{E_a}{R \times T}}}{1 + \left( e^{\frac{E_a}{R \times T_{opt}} - \frac{E_a}{R \times T}} \right)^2}$                                                                                                                                                     | $R$ is the universal gas constant; $E_a$ is the activation energy; and $T_{opt}$ is the optimum temperature                                                                                                                                          | Quinn et al. [80]                                   |
| $f(T) = e^{\frac{E_a}{R \times T_{opt}} - \frac{E_a}{R \times T}}$                                                                                                                                                                                                                                                     | $R$ is the universal gas constant; $E_a$ is the activation energy; and $T_{opt}$ is the optimum temperature                                                                                                                                          | Geider et al. [81]                                  |
| $f(T) = \begin{cases} 0 & \text{if } T < T_{min} \\ \frac{T - T_{min}}{T_{opt-low} - T_{min}} & \text{if } T_{min} < T < T_{opt-low} \\ 1 & \text{if } T_{opt-low} < T < T_{opt-high} \\ \frac{T_{max} - T}{T_{max} - T_{opt-high}} & \text{if } T_{opt-high} < T < T_{max} \\ 0 & \text{if } T > T_{max} \end{cases}$ | $T_{min}$ and $T_{max}$ are the minimum and maximum water temperature for zero productivity ( $^{\circ}\text{C}$ ), respectively; $T_{opt-low}$ and $T_{opt-high}$ are the lower and upper water temperature for optimal productivity, respectively; | Wigmosta et al. [82]; Kleiman et al. [83]           |

**Table S3.** Salinity factor

| Equation                                                                                                                                                                                                                                                                                                                                                                                                  | Remarks                                                                                                                                           | Reference               |
|-----------------------------------------------------------------------------------------------------------------------------------------------------------------------------------------------------------------------------------------------------------------------------------------------------------------------------------------------------------------------------------------------------------|---------------------------------------------------------------------------------------------------------------------------------------------------|-------------------------|
| $f_S = \begin{cases} 1 & (S \leq S_{min}) \\ a \times S + b & (S_{min} < S < S_{max}) \\ 0 & (S \geq S_{max}) \end{cases}$                                                                                                                                                                                                                                                                                | $S_{min}$ and $S_{max}$ are the minimum and maximum salinity                                                                                      | Gao et al. [27]         |
| $f(S) = \begin{cases} e^{-k_1^S \times (S - S_{opt})^2} & \text{for } S \leq S_{opt} \\ e^{-k_2^S \times (S - S_{opt})^2} & \text{for } S > S_{opt} \end{cases}$                                                                                                                                                                                                                                          | $S_{opt}$ is the optimum salinity; and $k_1^S$ and $k_2^S$ are the salinity effects below and above the optimal salinity, respectively            | Gharagozloo et al. [26] |
| $f(S) = \frac{Stox^2}{Stox^2 + S^2}$                                                                                                                                                                                                                                                                                                                                                                      | $Stox$ is the half-saturation constant for the effect of salinity on the growth                                                                   | Cerco and Cole [70]     |
| $f(S) = \frac{S - S_{min}}{S - S_{min} + S_h}$                                                                                                                                                                                                                                                                                                                                                            | Modified Mono relationship: $S_{min}$ is the minimum salinity below which organisms do not growth; and $S_h$ is the half saturation constant      | Dudley et al. [28]      |
| <p>Above the critical salinity level (<math>S_{crit}</math>):</p> $f(S) = \begin{cases} 1 - \left( \frac{S - S_{opt}}{S_{min} - S_{opt}} \right)^{2.5} & \text{for } S < S_{opt} \\ 1 - \left( \frac{S - S_{opt}}{S_{max} - S_{opt}} \right)^2 & \text{for } S \geq S_{opt} \end{cases}$ <p>Below the critical salinity level (<math>S_{crit}</math>):</p> $f(S) = \frac{S - S_{min}}{S_{opt} - S_{min}}$ | $S_{crit}$ is the salinity level at which growth slows down; $S_{min}$ , $S_{max}$ , and $S_{opt}$ are the minimum, maximum, and optimum salinity | Martins et al. [72]     |

*Cymbella cf. incurvata* (A)

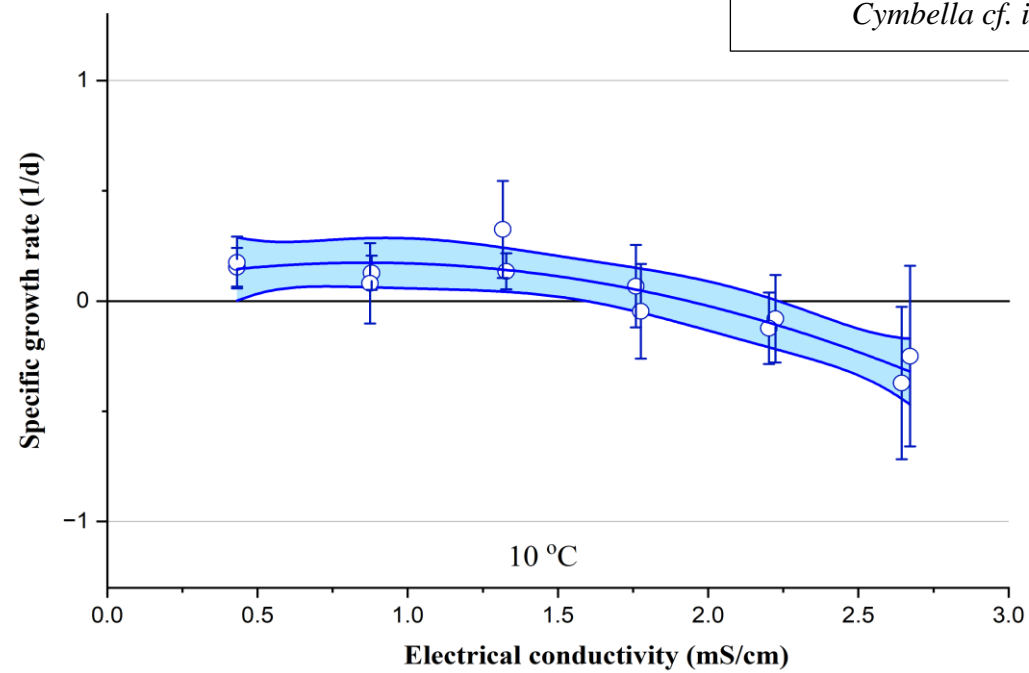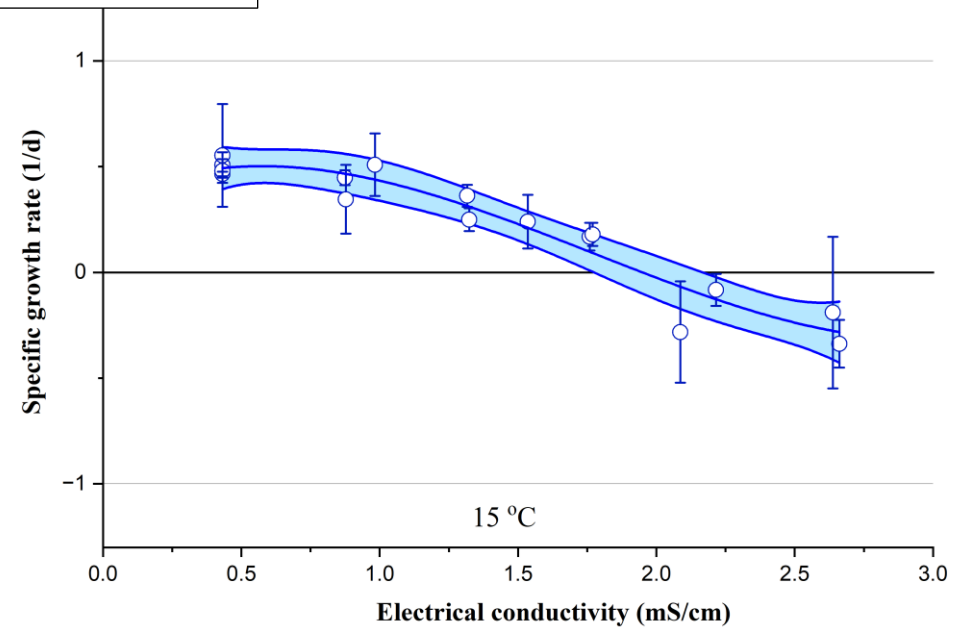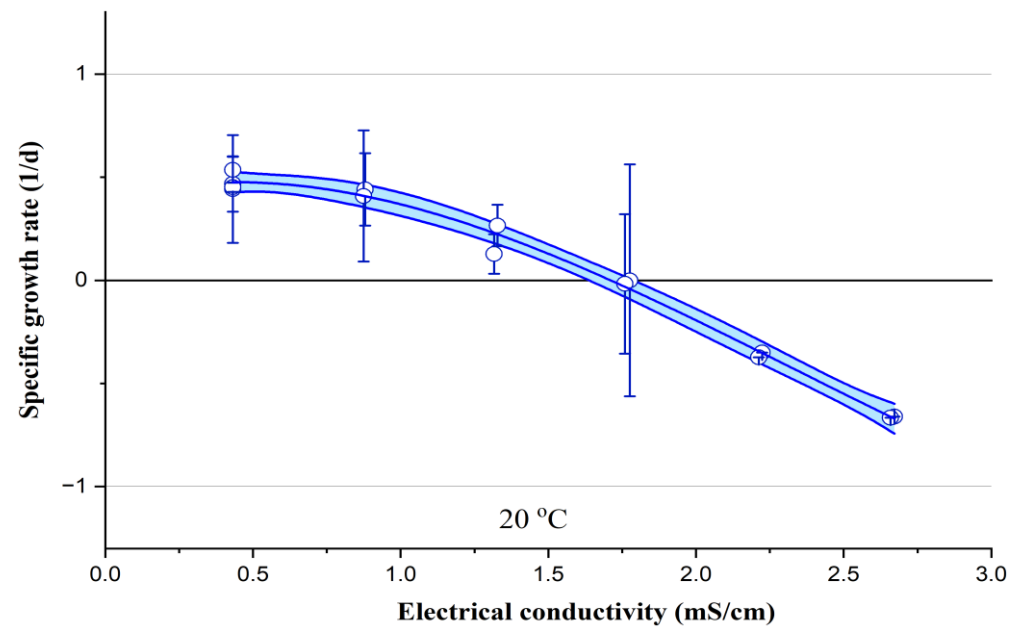

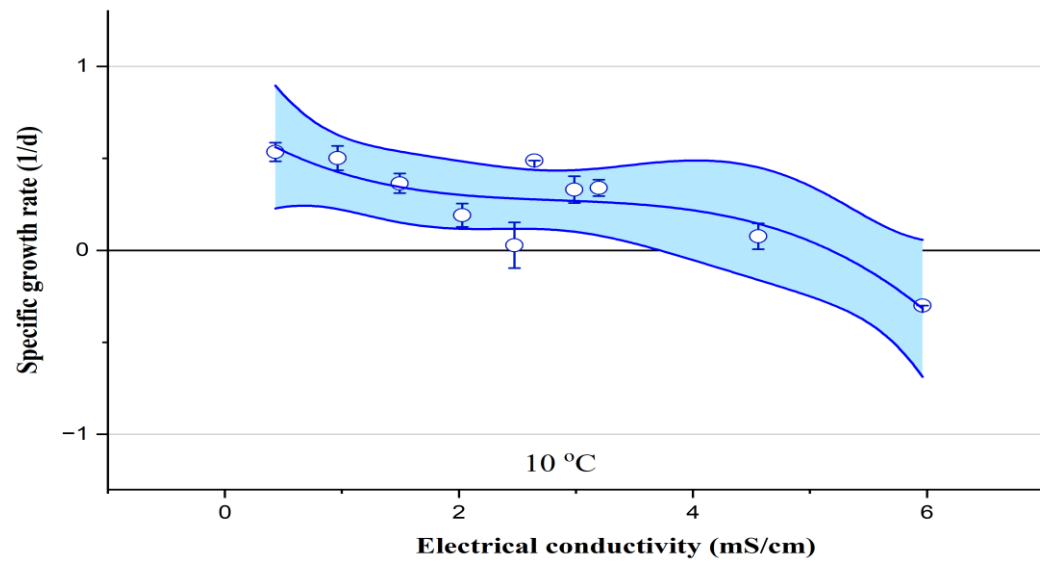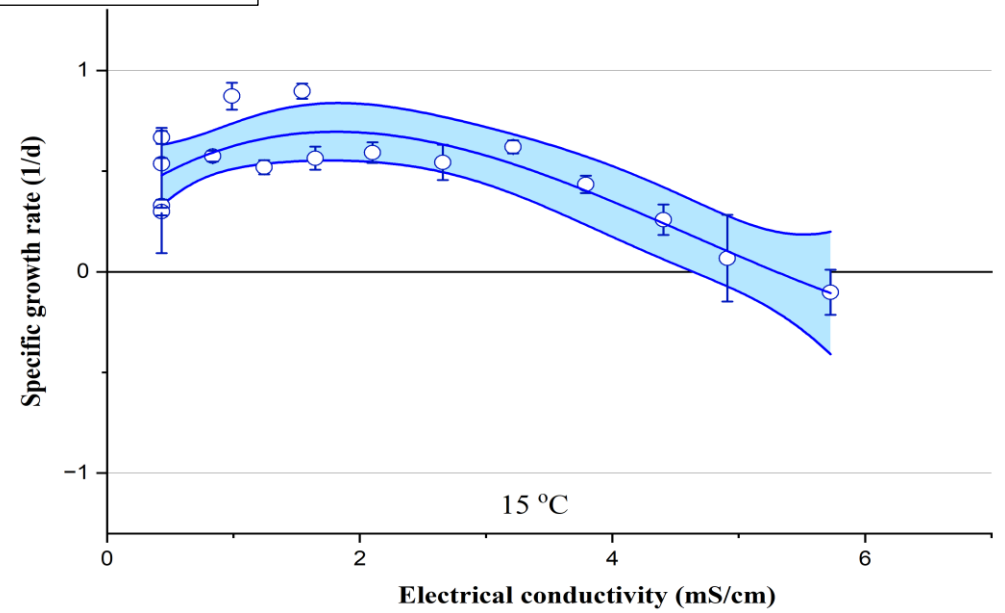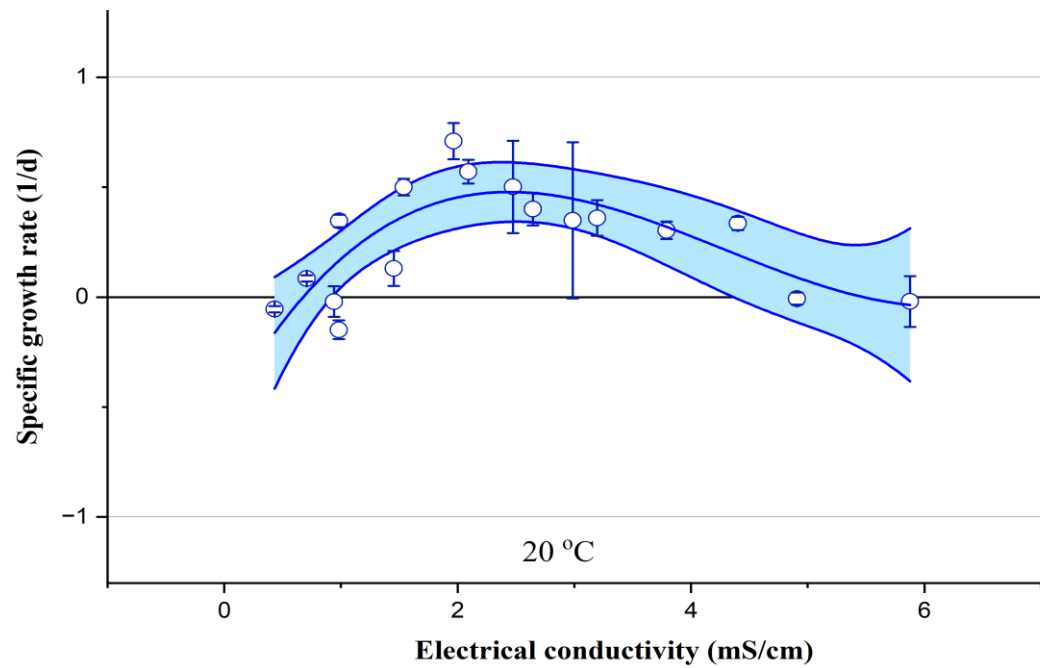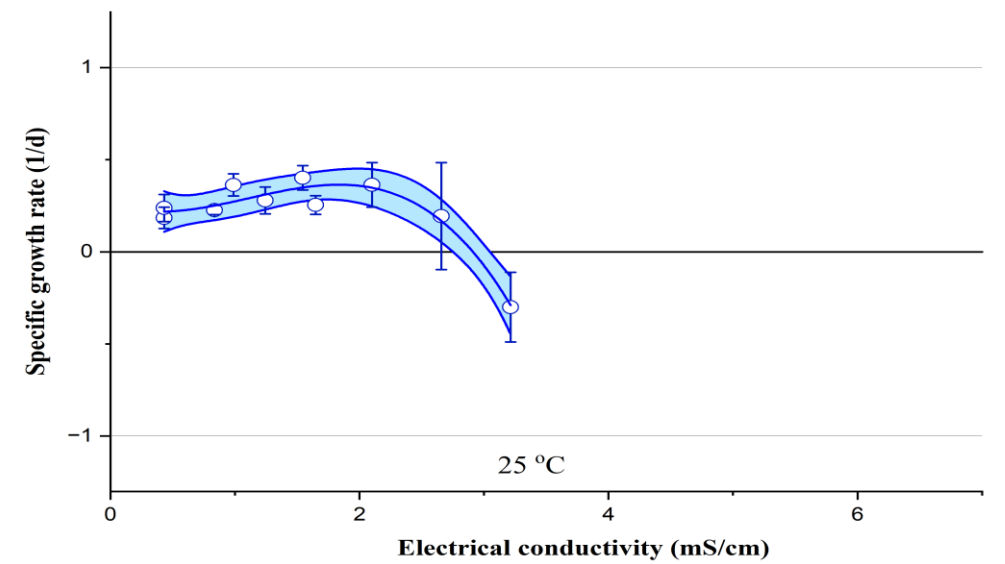

*Cyclotella meneghiniana* (C)

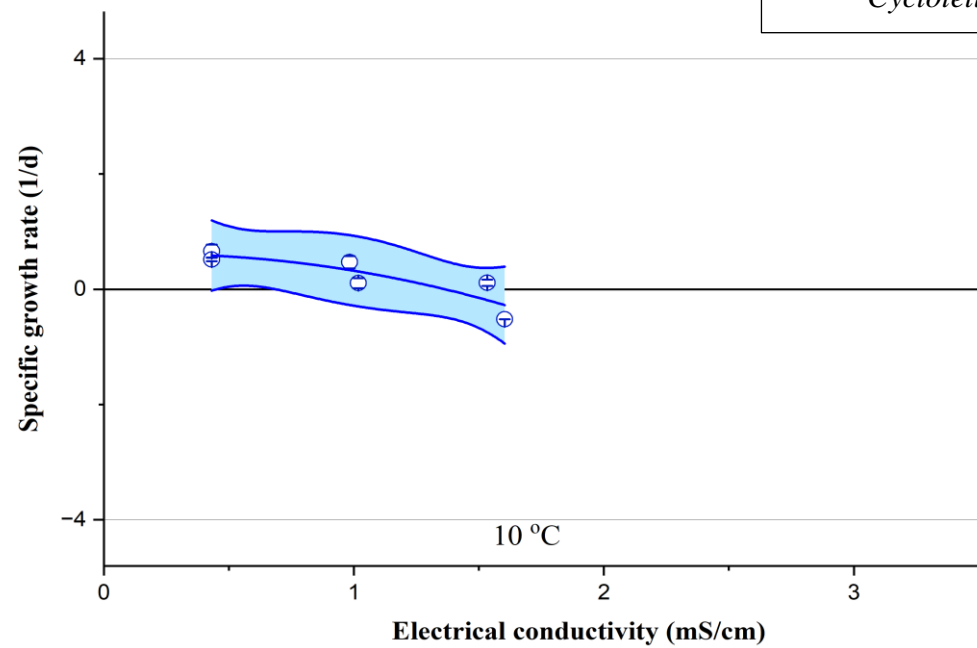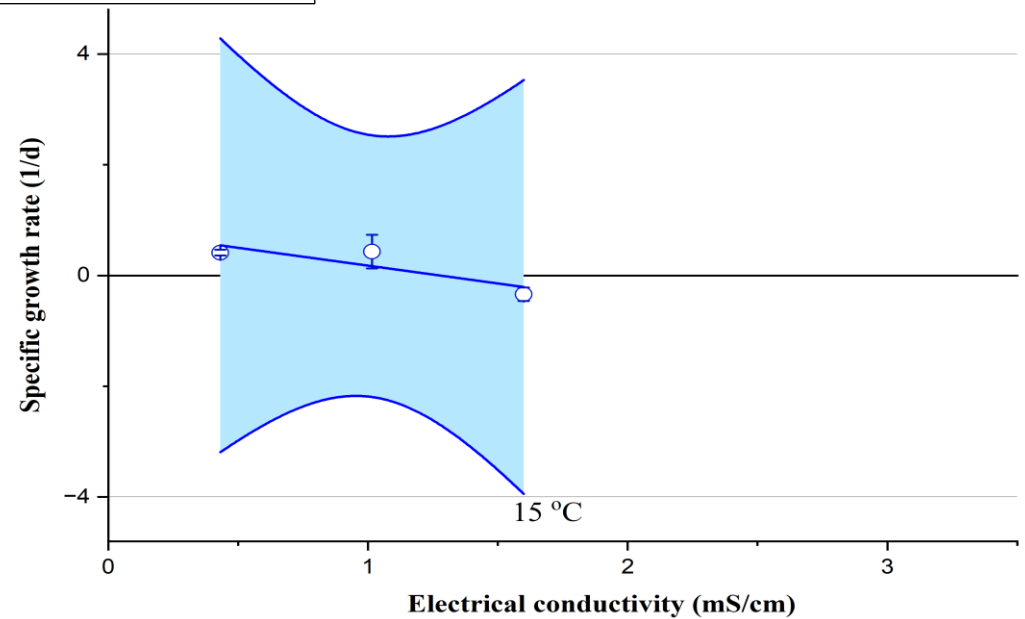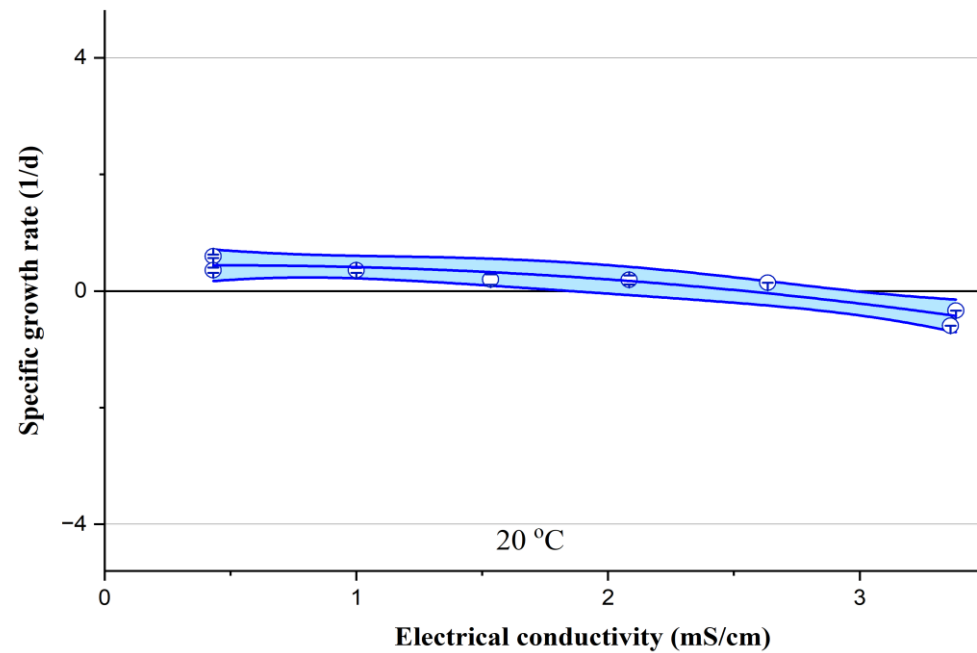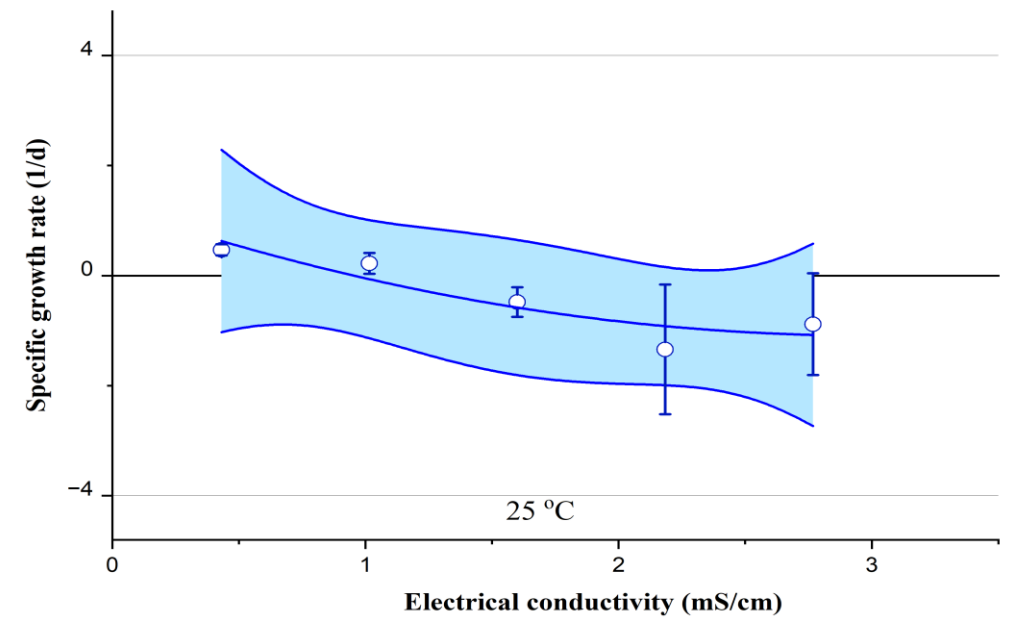

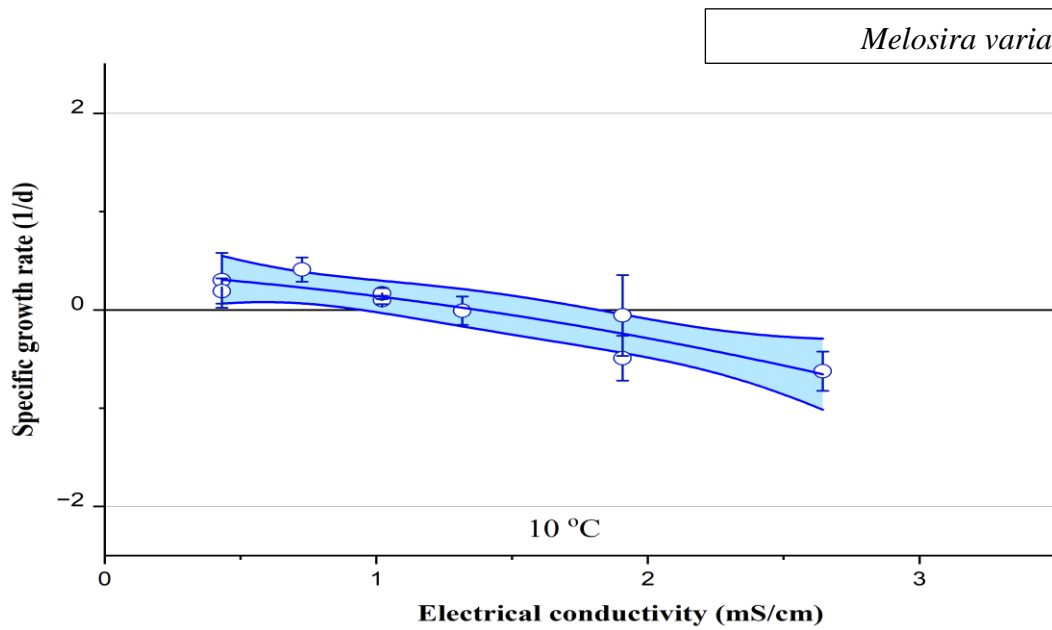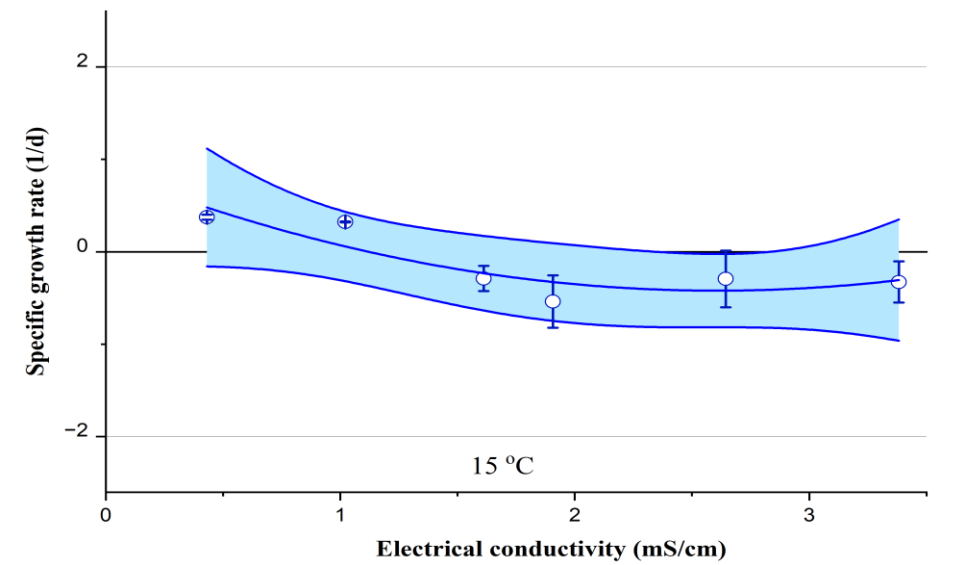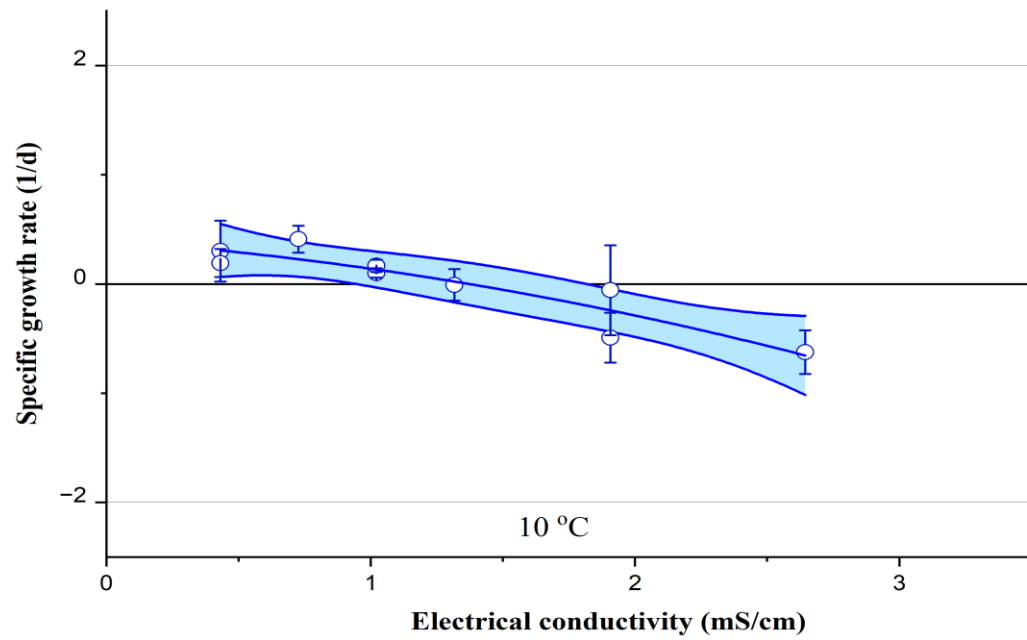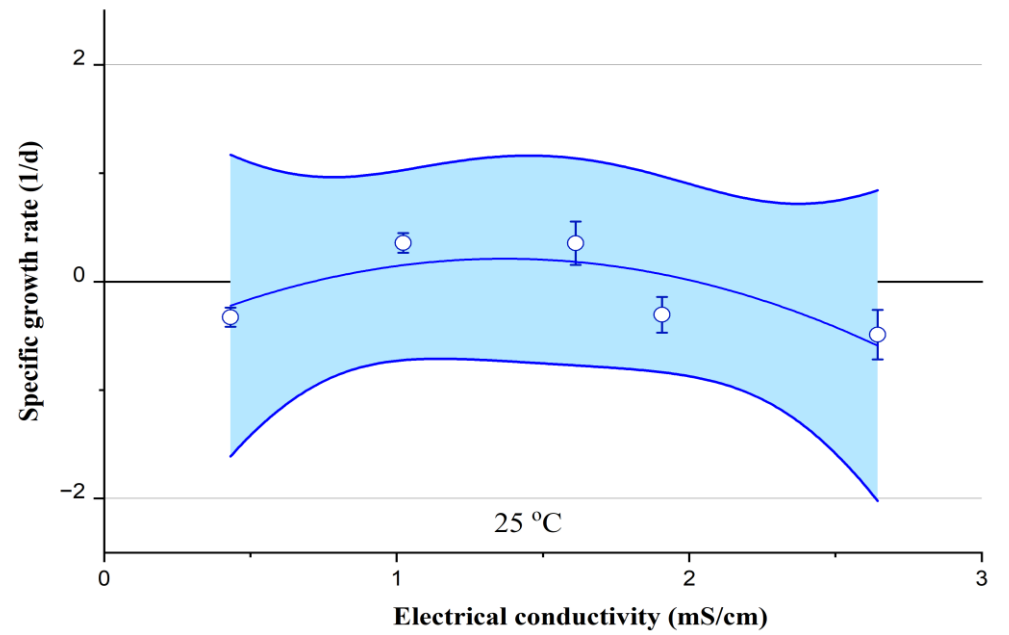



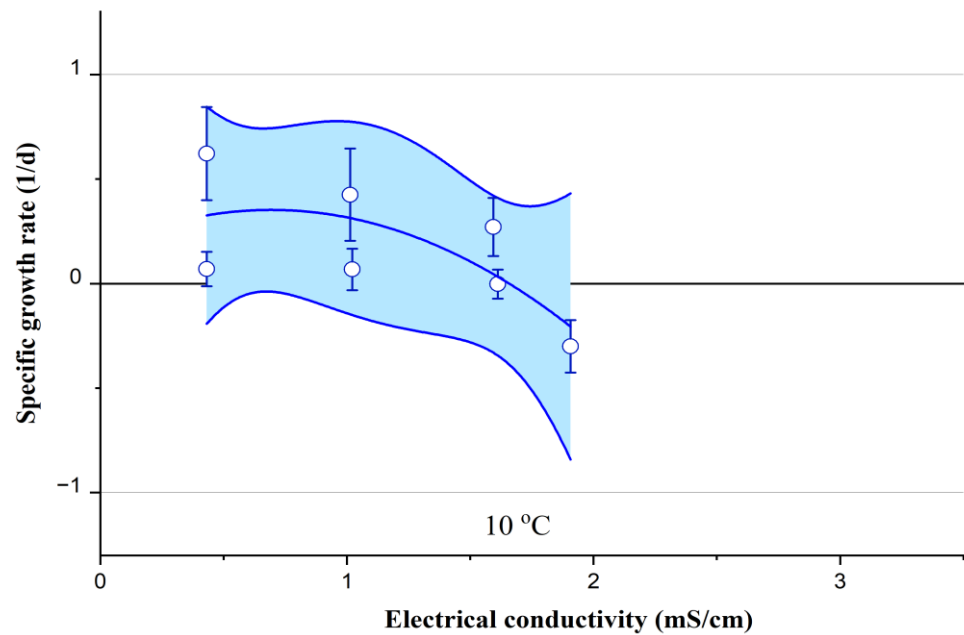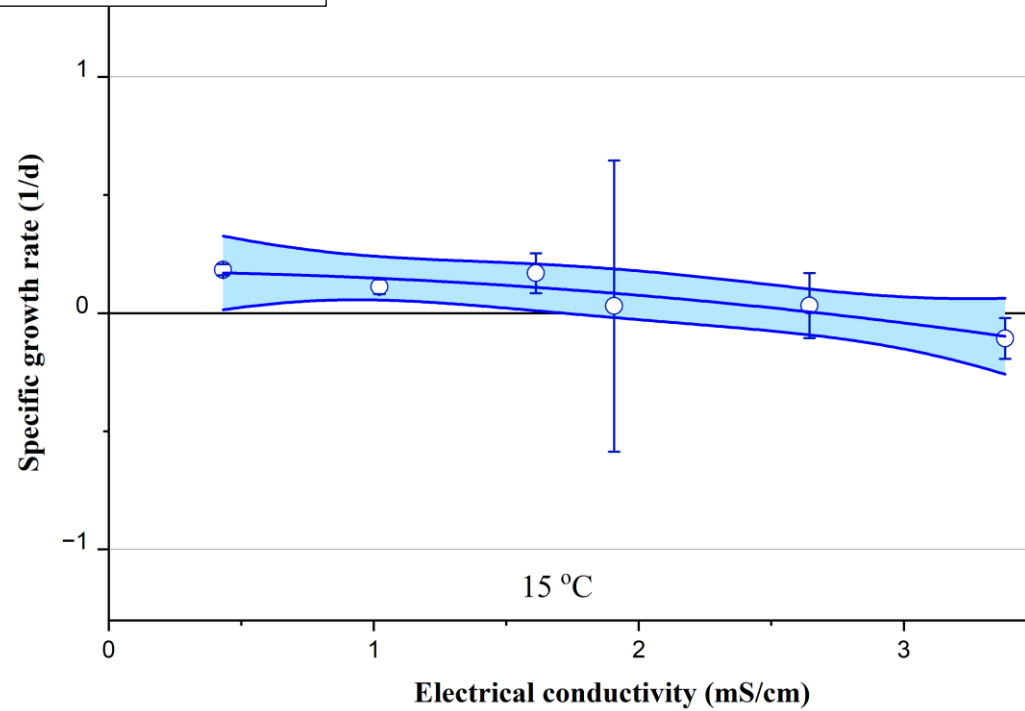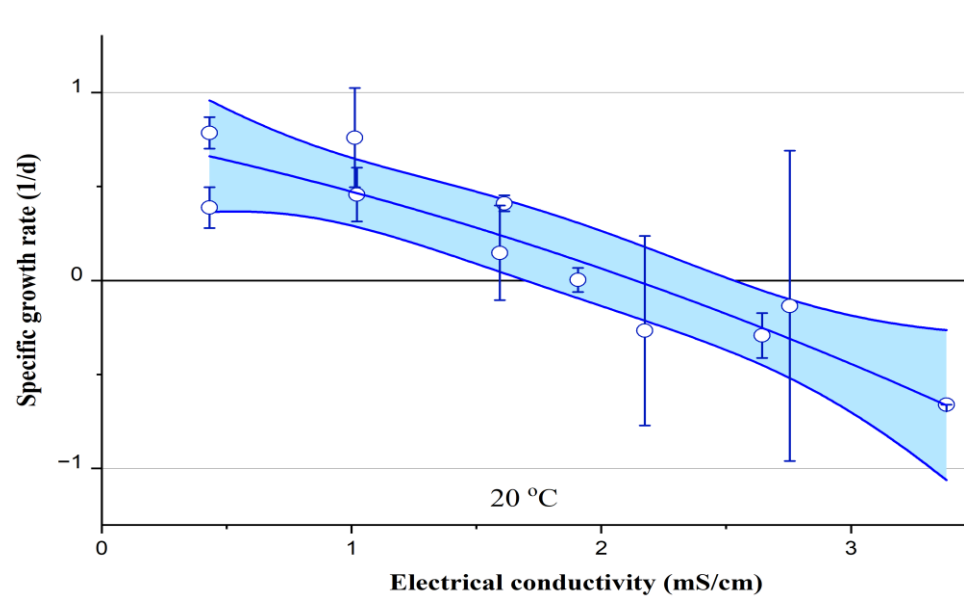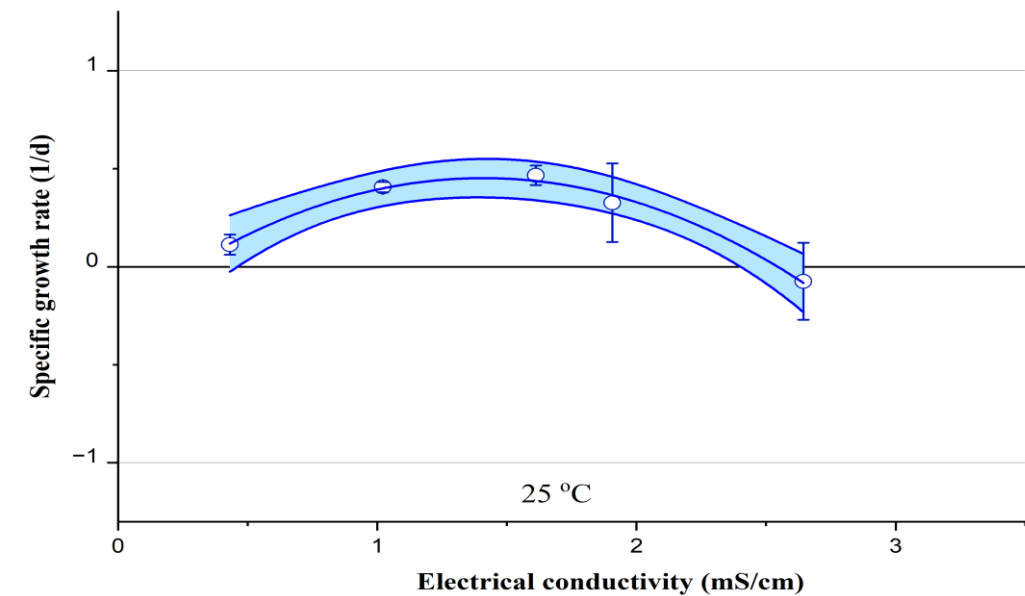

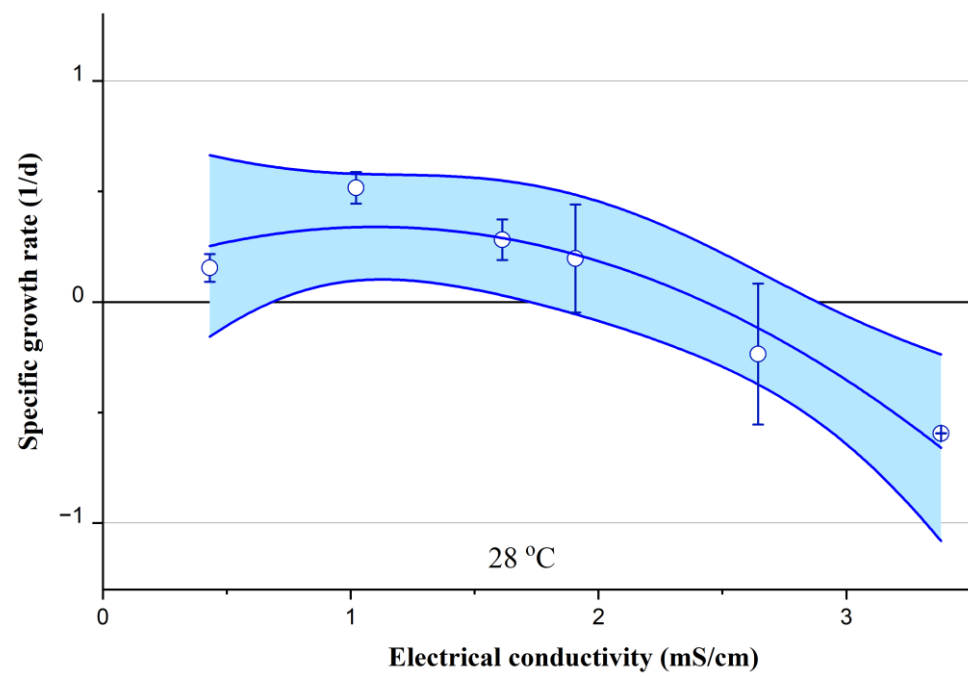

*Navicula gregaria* (F)

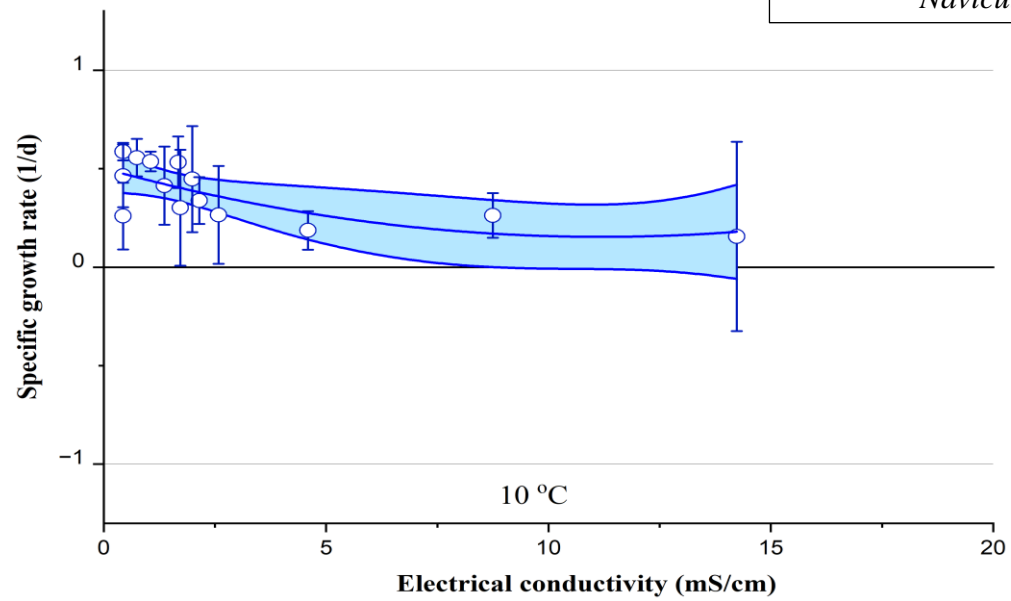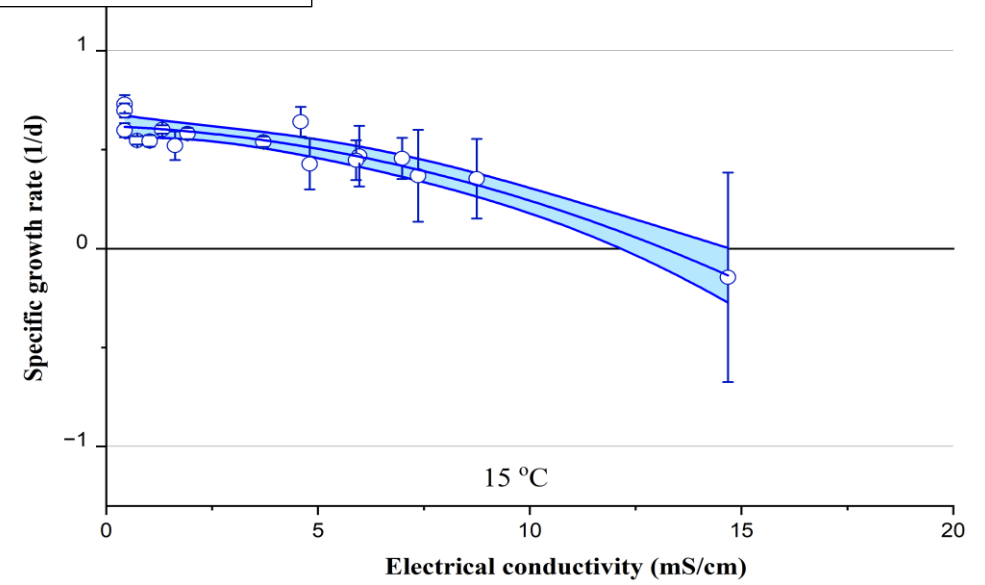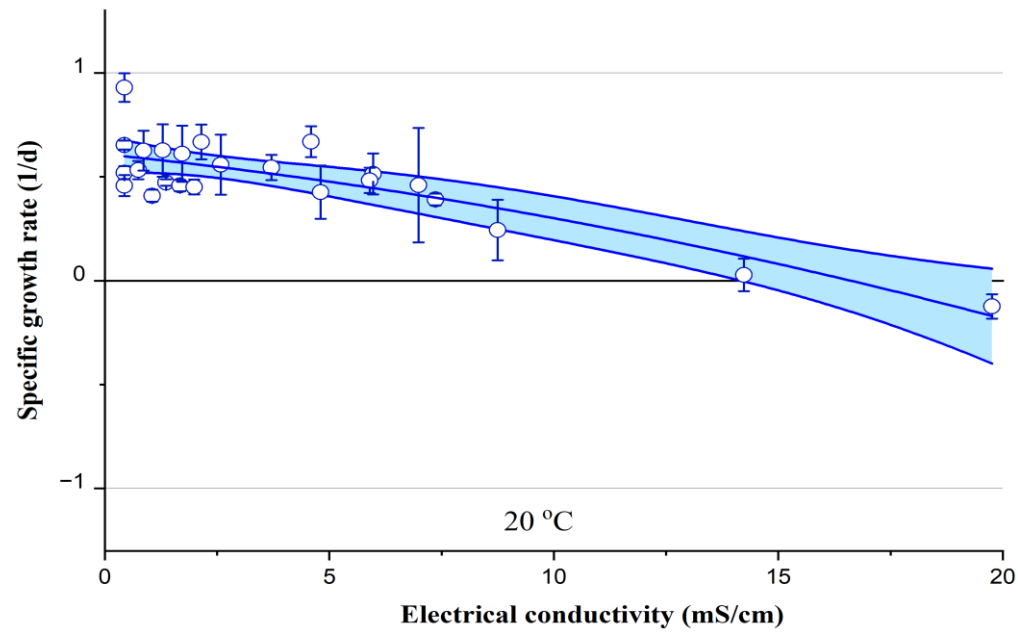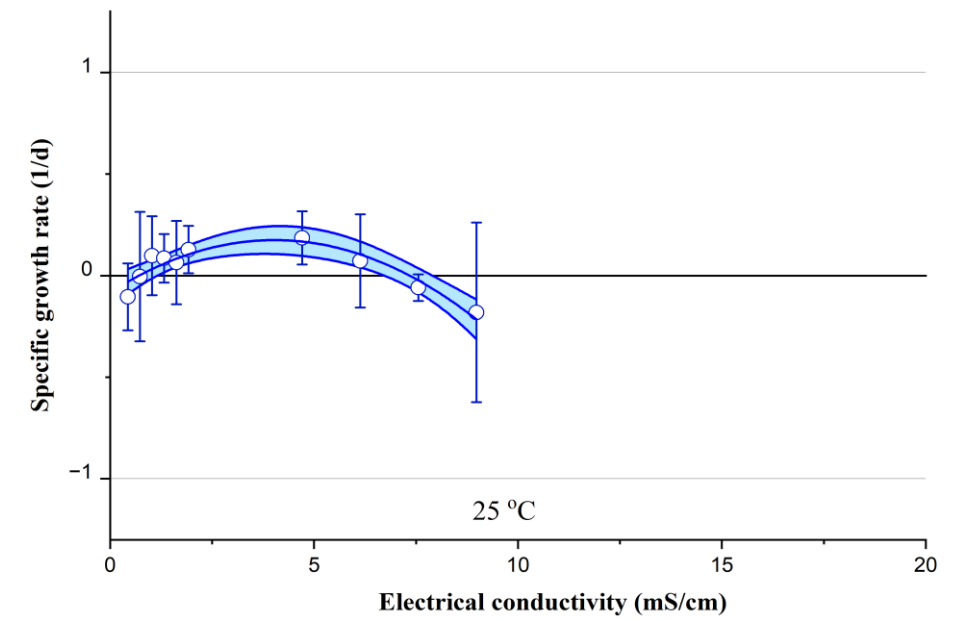

**Figure S1.** The salinity response curve describing the specific growth rate (1/d) of *Cymbella cf. incurvata*, *Nitzschia linearis*, *Cyclotella memeghiniana*, *Melosira varians*, *Ulnaria acus*, and *Navicula gregaria* with changing salinity represented by the electrical conductivity (mS/cm) at the temperature range of 10 - 28 °C. *Cymbella incurvate*: 25°C not included as the diatom did not grow regardless of the conductivity level.

### Empirical modelling for *Cymbella cf. incurvata*

**Table S4.** Results of empirical modelling the growth rate of *Cymbella cf. incurvata* at various temperature and electrical conductivity

| ID  | Equation                                                                                                                                                                        | Interaction     | Estimated coefficients |         |                             |                            | <i>p</i> | R <sup>2</sup> | AIC    |
|-----|---------------------------------------------------------------------------------------------------------------------------------------------------------------------------------|-----------------|------------------------|---------|-----------------------------|----------------------------|----------|----------------|--------|
|     |                                                                                                                                                                                 |                 | Parameter              | Mean    | Low-95% confidence interval | Up-95% confidence interval |          |                |        |
| ST1 | $\mu = \left( c \times e^{d \times T} \times \left( 1 - \left( \frac{T - z}{w/2} \right)^2 \right) \right) \times e^{-k_S \times (S - S_{opt})^2}$                              | Non-interactive | Sopt                   | 0.6797  | 0.2594                      | 1.0999                     | <0.005   | 0.82           | -57.67 |
|     |                                                                                                                                                                                 |                 | kS                     | 1.7703  | -1.0215                     | 4.5622                     | 0.19     |                |        |
|     |                                                                                                                                                                                 |                 | c                      | 0.1891  | -0.2884                     | 0.6665                     | 0.40     |                |        |
|     |                                                                                                                                                                                 |                 | d                      | 0.0692  | -0.0704                     | 0.2087                     | 0.30     |                |        |
|     |                                                                                                                                                                                 |                 | z                      | 15.4599 | 12.9659                     | 17.9539                    | <0.0001  |                |        |
|     |                                                                                                                                                                                 |                 | w                      | 14.6980 | 8.5812                      | 20.8148                    | <0.0005  |                |        |
| ST2 | $\mu = \left( c \times e^{d \times T} \times \left( 1 - \left( \frac{T - z}{w \times (1 + a_{ST} \times S)/2} \right)^2 \right) \right) \times e^{-k_S \times (S - S_{opt})^2}$ | Interactive     | Sopt                   | 0.6746  | -0.0415                     | 1.3906                     | 0.06     | 0.88           | -62.08 |
|     |                                                                                                                                                                                 |                 | kS                     | 0.8619  | -0.5651                     | 2.2890                     | 0.1      |                |        |
|     |                                                                                                                                                                                 |                 | c                      | 0.0575  | -0.0479                     | 0.1630                     | 0.25     |                |        |
|     |                                                                                                                                                                                 |                 | d                      | 0.1363  | 0.0333                      | 0.2393                     | <0.05    |                |        |
|     |                                                                                                                                                                                 |                 | z                      | 14.8642 | 12.8883                     | 16.8402                    | <0.0001  |                |        |
|     |                                                                                                                                                                                 |                 | w                      | 20.0451 | 14.7159                     | 25.3744                    | <0.0001  |                |        |
|     |                                                                                                                                                                                 |                 | aST                    | -0.3243 | -0.4186                     | -0.2301                    | <0.0001  |                |        |
| ST3 | $\mu = \left( c \times e^{d \times T} \times \left( 1 - \left( \frac{T - z}{w/2} \right)^2 \right) \right) \times \frac{Stox^2}{Stox^2 + S^2}$                                  | Non-interactive | Stox                   | 0.8209  | -0.0396                     | 1.6814                     | 0.06     | 0.72           | -51.94 |
|     |                                                                                                                                                                                 |                 | c                      | 0.2882  | -0.6794                     | 1.2557                     | 0.53     |                |        |
|     |                                                                                                                                                                                 |                 | d                      | 0.0591  | -0.1178                     | 0.2360                     | 0.48     |                |        |
|     |                                                                                                                                                                                 |                 | z                      | 15.5601 | 12.6621                     | 18.4581                    | <0.0001  |                |        |
|     |                                                                                                                                                                                 |                 | w                      | 14.6458 | 7.3730                      | 21.9185                    | 0.0009   |                |        |
| ST4 | $\mu = \left( c \times e^{d \times T} \times \left( 1 - \left( \frac{T - z}{w \times (1 + a_{ST} \times S)/2} \right)^2 \right) \right) \times \frac{Stox^2}{Stox^2 + S^2}$     | Interactive     | Stox                   | 1.2682  | 0.1920                      | 2.3443                     | <0.05    | 0.85           | -60.63 |
|     |                                                                                                                                                                                 |                 | c                      | 0.0764  | -0.0748                     | 0.2275                     | 0.29     |                |        |
|     |                                                                                                                                                                                 |                 | d                      | 0.1275  | 0.0252                      | 0.2297                     | <0.05    |                |        |
|     |                                                                                                                                                                                 |                 | z                      | 14.8729 | 13.0040                     | 16.7417                    | <0.0001  |                |        |
|     |                                                                                                                                                                                 |                 | w                      | 19.7513 | 14.8052                     | 24.6975                    | <0.0001  |                |        |
|     |                                                                                                                                                                                 |                 | aST                    | -0.2991 | -0.3643                     | -0.2339                    | <0.0001  |                |        |
| ST5 |                                                                                                                                                                                 |                 | gmax                   | 0.6348  | 0.3835                      | 0.8861                     | 0.0001   | 0.79           | -57.24 |

|      |                                                                                                                                                   |                 |                  |         |         |         |         |      |        |
|------|---------------------------------------------------------------------------------------------------------------------------------------------------|-----------------|------------------|---------|---------|---------|---------|------|--------|
|      | $\mu = \mu_{max} \times \left(1 - \left(\frac{T - T_{opt}}{w/2}\right)^2\right) \times e^{-k_S \times (S - S_{opt})^2}$                           | Non-interactive | Sopt             | 0.6355  | 0.1377  | 1.1333  | 0.0166  |      |        |
|      |                                                                                                                                                   |                 | kS               | 1.6390  | -1.1215 | 4.3995  | 0.2201  |      |        |
|      |                                                                                                                                                   |                 | T <sub>opt</sub> | 15.7838 | 14.7589 | 16.8086 | <0.0001 |      |        |
|      |                                                                                                                                                   |                 | w                | 13.0584 | 11.1560 | 14.9608 | <0.0001 |      |        |
| ST6  | $\mu = \mu_{max} \times \left(1 - \left(\frac{T - T_{opt}}{w/2}\right)^2\right) \times \frac{Stox^2}{Stox^2 + S^2}$                               | Non-interactive | gmax             | 0.8225  | 0.1558  | 1.4893  | <0.05   | 0.70 | -52.95 |
|      |                                                                                                                                                   |                 | Stox             | 0.8106  | 0.0121  | 1.6091  | <0.05   |      |        |
|      |                                                                                                                                                   |                 | T <sub>opt</sub> | 15.7990 | 14.5127 | 17.0852 | <0.0001 |      |        |
|      |                                                                                                                                                   |                 | w                | 13.1725 | 10.9274 | 15.4176 | <0.0001 |      |        |
| ST7  | $\mu = \mu_{max} \times \left(1 - \left(\frac{T - T_{opt}}{w \times (1 + a_{ST} \times S)/2}\right)^2\right) \times \frac{Stox^2}{Stox^2 + S^2}$  | Interactive     | gmax             | 0.7361  | 0.2325  | 3.1656  | <0.01   | 0.73 | -52.53 |
|      |                                                                                                                                                   |                 | Stox             | 0.9954  | 0.4312  | 2.3083  | <0.05   |      |        |
|      |                                                                                                                                                   |                 | T <sub>opt</sub> | 15.2369 | 0.5413  | 28.1496 | <0.0001 |      |        |
|      |                                                                                                                                                   |                 | w                | 15.8511 | 1.6392  | 9.6701  | <0.0001 |      |        |
|      |                                                                                                                                                   |                 | aST              | -0.2526 | 0.0616  | -4.0991 | <0.005  |      |        |
| ST8  | $\mu = \left(c \times e^{d \times T} \times \left(1 - \left(\frac{T - z}{w/2}\right)^2\right)\right) \times (1 + a \times S)$                     | Non-interactive | a                | -0.5667 | -0.6347 | -0.4987 | <0.0001 | 0.90 | -69.45 |
|      |                                                                                                                                                   |                 | c                | 0.2730  | -0.2239 | 0.7698  | 0.25    |      |        |
|      |                                                                                                                                                   |                 | d                | 0.0707  | -0.0307 | 0.1721  | 0.15    |      |        |
|      |                                                                                                                                                   |                 | z                | 15.5559 | 13.6688 | 17.4429 | <0.0001 |      |        |
|      |                                                                                                                                                   |                 | w                | 15.2115 | 10.6102 | 19.8128 | <0.0001 |      |        |
| ST9  | $\mu = \mu_{max} \times \left(1 - \left(\frac{T - T_{opt}}{w/2}\right)^2\right) \times (1 + a \times S)$                                          | Non-interactive | gmax             | 0.9461  | 0.7206  | 1.1717  | <0.0001 | 0.87 | -67.26 |
|      |                                                                                                                                                   |                 | a                | -0.5629 | -0.6346 | -0.4913 | <0.0001 |      |        |
|      |                                                                                                                                                   |                 | T <sub>opt</sub> | 15.9167 | 15.1802 | 16.6532 | <0.0001 |      |        |
|      |                                                                                                                                                   |                 | w                | 13.4226 | 12.1193 | 14.7259 | <0.0001 |      |        |
| ST10 | $\mu = (\mu_{20} \times \theta^{T-20}) \times \left(1 - \left(\frac{S - S_{opt}}{S_{max} - S_{opt}}\right)^2\right)$                              | Non-interactive | Sopt             | 1.0703  | 0.7420  | 1.3986  | <0.0001 | 0.36 | -40.15 |
|      |                                                                                                                                                   |                 | Smax             | 1.8702  | 1.5902  | 2.1502  | <0.0001 |      |        |
|      |                                                                                                                                                   |                 | g20              | 0.3023  | -0.0210 | 0.6255  | 0.06    |      |        |
|      |                                                                                                                                                   |                 | theta            | 1.0099  | 0.8432  | 1.1765  | <0.0001 |      |        |
| ST11 | $\mu = (\mu_{20} \times \theta^{T-20}) \times \left(1 - \left(\frac{S - S_{opt}}{S_{max} \times (1 + a_{ST} \times T) - S_{opt}}\right)^2\right)$ | Interactive     | Sopt             | 0.7557  | 0.0721  | 1.4392  | <0.05   | 0.79 | -56.91 |
|      |                                                                                                                                                   |                 | Smax             | 4.8760  | 0.8776  | 8.8743  | <0.05   |      |        |
|      |                                                                                                                                                   |                 | g20              | 0.4320  | 0.2209  | 0.6430  | <0.001  |      |        |
|      |                                                                                                                                                   |                 | theta            | 1.1124  | 0.9809  | 1.2438  | <0.0001 |      |        |
|      |                                                                                                                                                   |                 | aST              | -0.0319 | -0.0481 | -0.0157 | <0.005  |      |        |
| ST12 |                                                                                                                                                   |                 | gmax             | 0.5998  | 0.4882  | 0.7114  | <0.0001 | 0.94 | -77.93 |

|      |                                                                                                                                                                                    |                 |      |         |         |         |         |      |        |
|------|------------------------------------------------------------------------------------------------------------------------------------------------------------------------------------|-----------------|------|---------|---------|---------|---------|------|--------|
|      | $\mu = \mu_{max} \times \left(1 - \left(\frac{T - T_{opt}}{w/2}\right)^2\right) \times \left(1 - \left(\frac{S - S_{opt}}{S_{max} - S_{opt}}\right)^2\right)$                      | Non-interactive | Sopt | 0.5520  | 0.0917  | 1.0124  | <0.05   |      |        |
|      |                                                                                                                                                                                    |                 | Smax | 1.8054  | 1.7106  | 1.9003  | <0.0001 |      |        |
|      |                                                                                                                                                                                    |                 | Topt | 15.8168 | 15.3170 | 16.3166 | <0.0001 |      |        |
|      |                                                                                                                                                                                    |                 | w    | 13.1184 | 12.1456 | 14.0911 | <0.0001 |      |        |
| ST13 | $\mu = \left(c \times e^{d \times T} \times \left(1 - \left(\frac{T - z}{w/2}\right)^2\right)\right) \times \left(1 - \left(\frac{S - S_{opt}}{S_{max} - S_{opt}}\right)^2\right)$ | Non-interactive | Sopt | 0.6251  | 0.3543  | 0.8959  | <0.0005 | 0.97 | -91.06 |
|      |                                                                                                                                                                                    |                 | Smax | 1.8138  | 1.7483  | 1.8793  | <0.0001 |      |        |
|      |                                                                                                                                                                                    |                 | c    | 0.1660  | 0.0218  | 0.3103  | <0.05   |      |        |
|      |                                                                                                                                                                                    |                 | d    | 0.0721  | 0.0241  | 0.1200  | <0.01   |      |        |
|      |                                                                                                                                                                                    |                 | z    | 15.4559 | 14.5913 | 16.3205 | <0.0001 |      |        |
|      |                                                                                                                                                                                    |                 | w    | 14.7773 | 12.6568 | 16.8978 | <0.0001 |      |        |
| ST14 | $\mu = \mu_{max} \times e^{-k_T \times (T - T_{opt})^2} \times \left(1 - \left(\frac{S - S_{opt}}{S_{max} - S_{opt}}\right)^2\right)$                                              | Non-interactive | gmax | 0.6117  | 0.1852  | 1.0383  | <0.01   | 0.66 | -46.78 |
|      |                                                                                                                                                                                    |                 | Sopt | 0.6812  | -0.1403 | 1.5026  | 0.10    |      |        |
|      |                                                                                                                                                                                    |                 | Smax | 1.8124  | 1.5894  | 2.0354  | <0.0001 |      |        |
|      |                                                                                                                                                                                    |                 | Topt | 16.8735 | 14.9965 | 18.7506 | <0.0001 |      |        |
|      |                                                                                                                                                                                    |                 | kT   | 0.0476  | -0.0359 | 0.1311  | 0.24    |      |        |
| 4    | $\mu = a + b_1 \times S + c_1 \times T + b_2 \times S^2 + c_2 \times T^2$                                                                                                          | Non-interactive | a    | -1.8402 | -2.8436 | -0.8367 | <0.01   | 0.82 | -59.42 |
|      |                                                                                                                                                                                    |                 | b1   | 0.2813  | -0.4242 | 0.9868  | 0.40    |      |        |
|      |                                                                                                                                                                                    |                 | c1   | 0.2980  | 0.1607  | 0.4352  | <0.001  |      |        |
|      |                                                                                                                                                                                    |                 | b2   | -0.2281 | -0.4945 | 0.0384  | 0.09    |      |        |
|      |                                                                                                                                                                                    |                 | c2   | -0.0099 | -0.0142 | -0.0056 | <0.001  |      |        |
| 5    | $\mu = a + b_1 \times S + c_1 \times T + b_2 \times S^2 + c_2 \times T^2 + d \times S \times T$                                                                                    | Interactive     | a    | -2.3513 | -3.8114 | -0.8912 | <0.01   | 0.83 | -59.09 |
|      |                                                                                                                                                                                    |                 | b1   | 0.5161  | -0.3428 | 1.3750  | 0.21    |      |        |
|      |                                                                                                                                                                                    |                 | c1   | 0.3482  | 0.1756  | 0.5208  | <0.001  |      |        |
|      |                                                                                                                                                                                    |                 | b2   | -0.2292 | -0.4969 | 0.0385  | 0.09    |      |        |
|      |                                                                                                                                                                                    |                 | c2   | -0.0109 | -0.0157 | -0.0061 | <0.001  |      |        |
|      |                                                                                                                                                                                    |                 | d    | -0.0152 | -0.0465 | 0.0162  | 0.31    |      |        |

\*w=Tmax-Tmin (thermal breadth)

### Empirical modelling for *Nitzschia linearis*

**Table S5.** Results of empirical modelling the growth rate of *Nitzschia linearis* at various temperature and electrical conductivity

| ID   | Equation                                                                                                                                             | Interaction     | Estimated coefficients |         |                             |                            | <i>p</i> | R <sup>2</sup> | AIC     |
|------|------------------------------------------------------------------------------------------------------------------------------------------------------|-----------------|------------------------|---------|-----------------------------|----------------------------|----------|----------------|---------|
|      |                                                                                                                                                      |                 | Parameter              | Mean    | Low-95% confidence interval | Up-95% confidence interval |          |                |         |
| ST5  | $\mu = \mu_{max} \times \left(1 - \left(\frac{T - T_{opt}}{w/2}\right)^2\right) \times e^{-k_S \times (S - S_{opt})^2}$                              | Non-interactive | $\mu_{max}$            | 0.5657  | 0.4129                      | 0.7186                     | <0.0001  | 0.46           | -125.01 |
|      |                                                                                                                                                      |                 | $S_{opt}$              | 2.1893  | 1.7197                      | 2.6590                     | <0.0001  |                |         |
|      |                                                                                                                                                      |                 | $k_S$                  | 0.2143  | 0.0515                      | 0.3770                     | <0.05    |                |         |
|      |                                                                                                                                                      |                 | $T_{opt}$              | 15.8861 | 13.9856                     | 17.7865                    | <0.0001  |                |         |
|      |                                                                                                                                                      |                 | $w$                    | 22.1174 | 15.8478                     | 28.3870                    | <0.0001  |                |         |
| ST15 | $\mu = \mu_{max} \times \left(1 - \left(\frac{T - T_{opt}}{w \times (1 + a_{ST} \times S)/2}\right)^2\right) \times e^{-k_S \times (S - S_{opt})^2}$ | Interactive     | $\mu_{max}$            | 0.5876  | 0.4568                      | 0.7184                     | <0.0001  | 0.59           | -133.49 |
|      |                                                                                                                                                      |                 | $S_{opt}$              | 2.4391  | 2.0223                      | 2.8560                     | <0.0001  |                |         |
|      |                                                                                                                                                      |                 | $k_S$                  | 0.1964  | 0.0722                      | 0.3207                     | <0.005   |                |         |
|      |                                                                                                                                                      |                 | $T_{opt}$              | 15.9085 | 14.7319                     | 17.0851                    | <0.0001  |                |         |
|      |                                                                                                                                                      |                 | $w$                    | 31.7550 | 24.1289                     | 39.3810                    | <0.0001  |                |         |
|      |                                                                                                                                                      |                 | $a_{ST}$               | -0.1437 | -0.1664                     | -0.1210                    | <0.0001  |                |         |
| ST6  | $\mu = \mu_{max} \times \left(1 - \left(\frac{T - T_{opt}}{w/2}\right)^2\right) \times \frac{S_{tox}^2}{S_{tox}^2 + S^2}$                            | Non-interactive | $\mu_{max}$            | 0.4833  | 0.3058                      | 0.6608                     | <0.0001  | 0.26           | -114.49 |
|      |                                                                                                                                                      |                 | $S_{tox}$              | 4.6024  | 1.1666                      | 8.0382                     | <0.05    |                |         |
|      |                                                                                                                                                      |                 | $T_{opt}$              | 14.6649 | 10.0600                     | 19.2698                    | <0.0001  |                |         |
|      |                                                                                                                                                      |                 | $w$                    | 26.2367 | 11.1795                     | 41.2939                    | <0.005   |                |         |
| ST9  | $\mu = \mu_{max} \times \left(1 - \left(\frac{T - T_{opt}}{w/2}\right)^2\right) \times (1 + a \times S)$                                             | Non-interactive | $g_{max}$              | 0.5688  | 0.3896                      | 0.7480                     | <0.0001  | 0.28           | -115.34 |
|      |                                                                                                                                                      |                 | $a$                    | -0.1453 | -0.2069                     | -0.0838                    | <0.0001  |                |         |
|      |                                                                                                                                                      |                 | $T_{opt}$              | 13.8935 | 7.8031                      | 19.9839                    | <0.0001  |                |         |
|      |                                                                                                                                                      |                 | $w$                    | 28.0140 | 9.2629                      | 46.7651                    | <0.005   |                |         |
| ST10 | $\mu = (\mu_{20} \times \theta^{T-20}) \times \left(1 - \left(\frac{S - S_{opt}}{S_{max} - S_{opt}}\right)^2\right)$                                 | Non-interactive | $S_{opt}$              | 2.0719  | 1.2661                      | 2.8777                     | <0.0001  | 0.39           | -122.01 |
|      |                                                                                                                                                      |                 | $S_{max}$              | 5.2591  | 4.6683                      | 5.8499                     | <0.0001  |                |         |
|      |                                                                                                                                                      |                 | $g_{20}$               | 0.3467  | 0.2507                      | 0.4427                     | <0.0001  |                |         |
|      |                                                                                                                                                      |                 | $\theta$               | 0.9694  | 0.9322                      | 1.0067                     | <0.0001  |                |         |
| ST12 |                                                                                                                                                      | Non-interactive | $g_{max}$              | 0.5179  | 0.4033                      | 0.6326                     | <0.0001  | 0.50           | -128.04 |
|      |                                                                                                                                                      |                 | $S_{opt}$              | 2.2804  | 1.7511                      | 2.8097                     | <0.0001  |                |         |



|      |                                                                                                                                                                                                                                                                              |                     |      |         |         |         |         |      |         |
|------|------------------------------------------------------------------------------------------------------------------------------------------------------------------------------------------------------------------------------------------------------------------------------|---------------------|------|---------|---------|---------|---------|------|---------|
|      | $\mu = \mu_{max} \times \left(1 - \left(\frac{T - T_{opt}}{w/2}\right)^2\right) \times \left(1 - \left(\frac{S - S_{opt}}{S_{max} - S_{opt}}\right)^2\right)$                                                                                                                |                     | Smax | 5.2670  | 4.7976  | 5.7364  | <0.0001 |      |         |
|      |                                                                                                                                                                                                                                                                              |                     | Topt | 15.5533 | 13.4107 | 17.6960 | <0.0001 |      |         |
|      |                                                                                                                                                                                                                                                                              |                     | w    | 22.9844 | 15.9500 | 30.0188 | <0.0001 |      |         |
| ST14 | $\mu = \mu_{max} \times e^{-k_T \times (T - T_{opt})^2} \times \left(1 - \left(\frac{S - S_{opt}}{S_{max} - S_{opt}}\right)^2\right)$                                                                                                                                        | Non-<br>interactive | gmax | 0.5677  | 0.4363  | 0.6992  | <0.0001 | 0.53 | -130.43 |
|      |                                                                                                                                                                                                                                                                              |                     | Sopt | 2.2623  | 1.7312  | 2.7935  | <0.0001 |      |         |
|      |                                                                                                                                                                                                                                                                              |                     | Smax | 5.2897  | 4.8400  | 5.7395  | <0.0001 |      |         |
|      |                                                                                                                                                                                                                                                                              |                     | Topt | 15.1495 | 13.5533 | 16.7458 | <0.0001 |      |         |
|      |                                                                                                                                                                                                                                                                              |                     | kT   | 0.0145  | 0.0046  | 0.0244  | <0.01   |      |         |
| ST16 | $\mu = \mu_{max} \times \left(1 - \left(\frac{T - T_{opt}}{w/2}\right)^2\right) \times \begin{cases} e^{-k_{S1} \times (S - S_{opt})^2} \text{ for } S \leq S_{opt} \\ e^{-k_{S2} \times (S - S_{opt})^2} \text{ for } S > S_{opt} \end{cases}$                              | Non-<br>interactive | μmax | 0.5699  | 0.4105  | 0.7292  | <0.0001 | 0.46 | -123.02 |
|      |                                                                                                                                                                                                                                                                              |                     | Sopt | 2.0956  | 0.7744  | 3.4168  | <0.005  |      |         |
|      |                                                                                                                                                                                                                                                                              |                     | kS1  | 0.2545  | -0.3431 | 0.8522  | 0.39    |      |         |
|      |                                                                                                                                                                                                                                                                              |                     | kS2  | 0.1976  | -0.1064 | 0.5016  | 0.20    |      |         |
|      |                                                                                                                                                                                                                                                                              |                     | Topt | 15.9072 | 13.9811 | 17.8332 | <0.0001 |      |         |
|      |                                                                                                                                                                                                                                                                              |                     | w    | 22.1147 | 15.7464 | 28.4830 | <0.0001 |      |         |
| ST17 | $\mu = \mu_{max} \times \left(1 - \left(\frac{T - T_{opt}}{w \times (1 + a_{ST} \times S)/2}\right)^2\right) \times \begin{cases} e^{-k_{S1} \times (S - S_{opt})^2} \text{ for } S \leq S_{opt} \\ e^{-k_{S2} \times (S - S_{opt})^2} \text{ for } S > S_{opt} \end{cases}$ | Interactive         | μmax | 0.5837  | 0.4492  | 0.7183  | <0.0001 | 0.59 | -131.76 |
|      |                                                                                                                                                                                                                                                                              |                     | Sopt | 2.8697  | 1.5426  | 4.1968  | 0.0001  |      |         |
|      |                                                                                                                                                                                                                                                                              |                     | kS1  | 0.1179  | -0.0643 | 0.3002  | 0.20    |      |         |
|      |                                                                                                                                                                                                                                                                              |                     | kS2  | 0.3161  | -0.2465 | 0.8786  | 0.26    |      |         |
|      |                                                                                                                                                                                                                                                                              |                     | Topt | 15.8588 | 14.6890 | 17.0286 | <0.0001 |      |         |
|      |                                                                                                                                                                                                                                                                              |                     | w    | 32.8157 | 23.9205 | 41.7109 | <0.0001 |      |         |
|      |                                                                                                                                                                                                                                                                              |                     | aST  | -0.1497 | -0.1809 | -0.1184 | <0.0001 |      |         |
| ST18 | $\mu = \mu_{max} \times e^{-k_T \times (T - T_{opt})^2} \times \begin{cases} e^{-k_{S1} \times (S - S_{opt})^2} \text{ for } S \leq S_{opt} \\ e^{-k_{S2} \times (S - S_{opt})^2} \text{ for } S > S_{opt} \end{cases}$                                                      | Non-<br>interactive | μmax | 0.6153  | 0.4352  | 0.7954  | <0.0001 | 0.50 | -125.52 |
|      |                                                                                                                                                                                                                                                                              |                     | Sopt | 2.5556  | 1.1274  | 3.9838  | <0.001  |      |         |
|      |                                                                                                                                                                                                                                                                              |                     | kS1  | 0.1192  | -0.1403 | 0.3788  | 0.36    |      |         |
|      |                                                                                                                                                                                                                                                                              |                     | kS2  | 0.3014  | -0.2630 | 0.8658  | 0.29    |      |         |
|      |                                                                                                                                                                                                                                                                              |                     | Topt | 15.3173 | 13.8052 | 16.8293 | <0.0001 |      |         |
|      |                                                                                                                                                                                                                                                                              |                     | kT   | 0.0163  | 0.0053  | 0.0273  | <0.005  |      |         |
| ST19 | $\mu = \mu_{max} \times e^{-k_T \times (T - T_{opt})^2} \times e^{-k_S \times (S - S_{opt})^2}$                                                                                                                                                                              | Non-<br>interactive | μmax | 0.6270  | 0.4522  | 0.8018  | <0.0001 | 0.50 | -127.49 |
|      |                                                                                                                                                                                                                                                                              |                     | Sopt | 2.1865  | 1.7372  | 2.6358  | <0.0001 |      |         |
|      |                                                                                                                                                                                                                                                                              |                     | kS   | 0.2139  | 0.0587  | 0.3691  | <0.01   |      |         |
|      |                                                                                                                                                                                                                                                                              |                     | Topt | 15.3972 | 13.8789 | 16.9156 | <0.0001 |      |         |
|      |                                                                                                                                                                                                                                                                              |                     | kT   | 0.0159  | 0.0053  | 0.0264  | <0.005  |      |         |

|      |                                                                                                                                                                                                                                     |                     |      |         |             |         |         |      |         |
|------|-------------------------------------------------------------------------------------------------------------------------------------------------------------------------------------------------------------------------------------|---------------------|------|---------|-------------|---------|---------|------|---------|
| ST20 | $\mu = \mu_{max} \times e^{-k_T \times (T - T_{opt})^2} \times (1 + a \times S)$                                                                                                                                                    | Non-<br>interactive | gmax | 0.6399  | 0.4268      | 0.8530  | <0.0001 | 0.31 | -117.07 |
|      |                                                                                                                                                                                                                                     |                     | a    | -0.1464 | -0.2042     | -0.0887 | <0.0001 |      |         |
|      |                                                                                                                                                                                                                                     |                     | Topt | 14.3144 | 11.7006     | 16.9282 | <0.0001 |      |         |
|      |                                                                                                                                                                                                                                     |                     | kT   | 0.0123  | -2.6719E-05 | 0.0246  | 0.05    |      |         |
| ST21 | $\mu = \mu_{max} \times e^{-k_T \times (T - T_{opt})^2} \times (1 + a \times (1 + a_{ST} \times T) \times S)$                                                                                                                       | Interactive         | gmax | 0.6749  | 0.4800      | 0.8698  | <0.0001 | 0.40 | -120.46 |
|      |                                                                                                                                                                                                                                     |                     | a    | -0.4000 | -0.6236     | -0.1764 | <0.001  |      |         |
|      |                                                                                                                                                                                                                                     |                     | Topt | 12.2481 | 7.8229      | 16.6734 | <0.0001 |      |         |
|      |                                                                                                                                                                                                                                     |                     | kT   | 0.0119  | -0.0003     | 0.0241  | 0.05    |      |         |
| ST22 | $\mu = \mu_{max} \times e^{-(k_T \times (1 + a_{ST} \times S)) \times (T - T_{opt})^2} \times (1 + a \times S)$                                                                                                                     | Interactive         | aST  | -0.0453 | -0.0649     | -0.0256 | <0.0001 | 0.35 | -117.83 |
|      |                                                                                                                                                                                                                                     |                     | gmax | 0.7827  | 0.5550      | 1.0105  | <0.0001 |      |         |
|      |                                                                                                                                                                                                                                     |                     | a    | -0.1797 | -0.2167     | -0.1427 | <0.0001 |      |         |
|      |                                                                                                                                                                                                                                     |                     | Topt | 13.6861 | 11.9385     | 15.4337 | <0.0001 |      |         |
| ST23 | $\mu = \mu_{max} \times \begin{cases} e^{-k_T \times (T - T_{opt})^2} & \text{for } T \leq T_{opt} \\ e^{-(k_T \times (1 + a_{ST} \times S)) \times (T - T_{opt})^2} & \text{for } T > T_{opt} \end{cases} \times (1 + a \times S)$ | Interactive         | kT   | 0.0338  | 0.0049      | 0.0628  | <0.05   | 0.37 | -118.88 |
|      |                                                                                                                                                                                                                                     |                     | aST  | -0.2589 | -0.3991     | -0.1187 | <0.001  |      |         |
|      |                                                                                                                                                                                                                                     |                     | gmax | 0.7984  | 0.5493      | 1.0474  | <0.0001 |      |         |
|      |                                                                                                                                                                                                                                     |                     | a    | -0.1728 | -0.2163     | -0.1293 | <0.0001 |      |         |
| 4    | $\mu = a + b_1 \times S + c_1 \times T + b_2 \times S^2 + c_2 \times T^2$                                                                                                                                                           | Non-<br>interactive | Topt | 13.3368 | 11.8580     | 14.8156 | <0.0001 | 0.51 | -128.74 |
|      |                                                                                                                                                                                                                                     |                     | kT   | 0.0309  | 0.0068      | 0.0549  | <0.05   |      |         |
|      |                                                                                                                                                                                                                                     |                     | aST  | -0.2553 | -0.3898     | -0.1208 | <0.001  |      |         |
|      |                                                                                                                                                                                                                                     |                     | a    | -0.4642 | -1.1551     | 0.2268  | 0.18    |      |         |
| 5    | $\mu = a + b_1 \times S + c_1 \times T + b_2 \times S^2 + c_2 \times T^2 + d \times S \times T$                                                                                                                                     | Interactive         | b1   | 0.1897  | 0.0468      | 0.3326  | <0.05   | 0.51 | -126.9  |
|      |                                                                                                                                                                                                                                     |                     | c1   | 0.1007  | 0.0170      | 0.1844  | <0.05   |      |         |
|      |                                                                                                                                                                                                                                     |                     | b2   | -0.0457 | -0.0694     | -0.0220 | <0.0005 |      |         |
|      |                                                                                                                                                                                                                                     |                     | c2   | -0.0033 | -0.0057     | -0.0009 | <0.01   |      |         |
|      |                                                                                                                                                                                                                                     |                     | a    | -0.3481 | -1.2761     | 0.5799  | 0.45    |      |         |
|      |                                                                                                                                                                                                                                     |                     | b1   | 0.1494  | -0.1068     | 0.4057  | 0.24    |      |         |
|      |                                                                                                                                                                                                                                     |                     | c1   | 0.0916  | -0.0059     | 0.1891  | 0.06    |      |         |
|      |                                                                                                                                                                                                                                     |                     | b2   | -0.0437 | -0.0699     | -0.0175 | <0.005  |      |         |
|      |                                                                                                                                                                                                                                     |                     | c2   | -0.0032 | -0.0057     | -0.0006 | <0.05   |      |         |
|      |                                                                                                                                                                                                                                     |                     | d    | 0.0019  | -0.0079     | 0.0116  | 0.70    |      |         |

### Empirical modelling for *Cyclotella meneghiniana*

**Table S6.** Results of empirical modelling the growth rate of *Cyclotella meneghiniana* at various temperature and electrical conductivity

| ID   | Equation                                                                                                                                               | Interaction     | Estimated coefficients |         |                             |                            | p       | R <sup>2</sup> | AIC    |
|------|--------------------------------------------------------------------------------------------------------------------------------------------------------|-----------------|------------------------|---------|-----------------------------|----------------------------|---------|----------------|--------|
|      |                                                                                                                                                        |                 | Parameter              | Mean    | Low-95% confidence interval | Up-95% confidence interval |         |                |        |
| ST5  | $\mu = \mu_{max} \times \left(1 - \left(\frac{T - T_{opt}}{w/2}\right)^2\right) \times e^{-k_S \times (S - S_{opt})^2}$                                | Non-interactive | gmax                   | 0.7941  | -12.3711                    | 13.9593                    | 0.90    | 0.52           | -32.35 |
|      |                                                                                                                                                        |                 | Sopt                   | 0.6714  | -0.5517                     | 1.8946                     | 0.25    |                |        |
|      |                                                                                                                                                        |                 | kS                     | 8.1865  | -197.4462                   | 213.8192                   | 0.93    |                |        |
|      |                                                                                                                                                        |                 | Topt                   | 17.5724 | -5.6624                     | 40.8073                    | 0.12    |                |        |
|      |                                                                                                                                                        |                 | w                      | 43.7472 | -165.1991                   | 252.6935                   | 0.65    |                |        |
| ST15 | $\mu = \mu_{max} \times \left(1 - \left(\frac{T - T_{opt}}{w \times (1 + a_{ST} \times S)/2}\right)^2\right) \times e^{-k_S \times (S - S_{opt})^2}$   | Interactive     | gmax                   | 0.8862  | -0.3230                     | 2.0953                     | 0.13    | 0.80           | -43.90 |
|      |                                                                                                                                                        |                 | Sopt                   | 0.6946  | 0.5815                      | 0.8078                     | <0.0001 |                |        |
|      |                                                                                                                                                        |                 | kS                     | 8.3844  | -5.5104                     | 22.2793                    | 0.21    |                |        |
|      |                                                                                                                                                        |                 | Topt                   | 17.3311 | 13.9071                     | 20.7551                    | <0.0001 |                |        |
|      |                                                                                                                                                        |                 | w                      | 59.5962 | -1.7673                     | 120.9596                   | 0.06    |                |        |
|      |                                                                                                                                                        |                 | aST                    | -0.6176 | -0.6478                     | -0.5873                    | <0.0001 |                |        |
| ST6  | $\mu = \mu_{max} \times \left(1 - \left(\frac{T - T_{opt}}{w/2}\right)^2\right) \times \frac{S_{tox}^2}{S_{tox}^2 + S^2}$                              | Non-interactive | gmax                   | 1.1435  | -3.6159                     | 5.9028                     | 0.61    | 0.40           | -31.06 |
|      |                                                                                                                                                        |                 | Stox                   | 0.3837  | -0.9310                     | 1.6985                     | 0.54    |                |        |
|      |                                                                                                                                                        |                 | Topt                   | 17.4092 | -10.7580                    | 45.5764                    | 0.20    |                |        |
|      |                                                                                                                                                        |                 | w                      | 44.8950 | -220.6810                   | 310.4711                   | 0.72    |                |        |
| ST7  | $\mu = \mu_{max} \times \left(1 - \left(\frac{T - T_{opt}}{w \times (1 + a_{ST} \times S)/2}\right)^2\right) \times \frac{S_{tox}^2}{S_{tox}^2 + S^2}$ | Interactive     | gmax                   | 0.7028  | -0.0270                     | 1.4327                     | 0.06    | 0.54           | -33.02 |
|      |                                                                                                                                                        |                 | Stox                   | 1.0195  | -0.5274                     | 2.5664                     | 0.17    |                |        |
|      |                                                                                                                                                        |                 | Topt                   | 17.9600 | 14.8567                     | 21.0634                    | <0.0001 |                |        |
|      |                                                                                                                                                        |                 | w                      | 23.8644 | 12.1770                     | 35.5518                    | <0.001  |                |        |
|      |                                                                                                                                                        |                 | aST                    | -0.2767 | -0.3190                     | -0.2343                    | <0.0001 |                |        |
| ST14 | $\mu = \mu_{max} \times e^{-k_T \times (T - T_{opt})^2} \times \left(1 - \left(\frac{S - S_{opt}}{S_{max} - S_{opt}}\right)^2\right)$                  | Non-interactive | gmax                   | 0.7245  | -0.0195                     | 1.4684                     | 0.06    | 0.36           | -28.09 |
|      |                                                                                                                                                        |                 | Sopt                   | 0.5586  | -0.7045                     | 1.8217                     | 0.35    |                |        |
|      |                                                                                                                                                        |                 | Smax                   | 1.3806  | 1.0554                      | 1.7058                     | <0.0001 |                |        |
|      |                                                                                                                                                        |                 | Topt                   | 12.6795 | 10.4587                     | 14.9002                    | <0.0001 |                |        |
|      |                                                                                                                                                        |                 | kT                     | 0.0672  | -0.0165                     | 0.1509                     | 0.10    |                |        |

|      |                                                                                                                                                                                                                           |                 |       |         |           |          |         |      |        |
|------|---------------------------------------------------------------------------------------------------------------------------------------------------------------------------------------------------------------------------|-----------------|-------|---------|-----------|----------|---------|------|--------|
| ST19 | $\mu = \mu_{max} \times e^{-k_T \times (T - T_{opt})^2} \times e^{-k_S \times (S - S_{opt})^2}$                                                                                                                           | Non-interactive | gmax  | 0.7947  | -12.3438  | 13.9332  | 0.90    | 0.52 | -32.35 |
|      |                                                                                                                                                                                                                           |                 | Sopt  | 0.6714  | -0.5487   | 1.8915   | 0.25    |      |        |
|      |                                                                                                                                                                                                                           |                 | kS    | 8.1857  | -196.8737 | 213.2450 | 0.93    |      |        |
|      |                                                                                                                                                                                                                           |                 | Topt  | 17.5680 | -6.6448   | 41.7808  | 0.14    |      |        |
|      |                                                                                                                                                                                                                           |                 | kT    | 0.0022  | -0.0207   | 0.0252   | 0.83    |      |        |
| ST21 | $\mu = \mu_{max} \times e^{-k_T \times (T - T_{opt})^2} \times (1 + a \times (1 + a_{ST} \times T) \times S)$                                                                                                             | Interactive     | gmax  | 0.8313  | 0.2452    | 1.4174   | <0.01   | 0.53 | -32.72 |
|      |                                                                                                                                                                                                                           |                 | a     | -1.2154 | -1.8982   | -0.5327  | <0.005  |      |        |
|      |                                                                                                                                                                                                                           |                 | Topt  | 12.8148 | 0.3357    | 25.2938  | <0.05   |      |        |
|      |                                                                                                                                                                                                                           |                 | kT    | 0.0090  | -0.0186   | 0.0367   | 0.49    |      |        |
|      |                                                                                                                                                                                                                           |                 | aST   | -0.0317 | -0.0479   | -0.0154  | <0.005  |      |        |
| ST24 | $\mu = (\mu_{20} \times \theta^{T-20}) \times \frac{S_{tox}^2}{S_{tox}^2 + S^2}$                                                                                                                                          | Non-interactive | Stox  | 0.3559  | -0.9458   | 1.6576   | 0.56    | 0.40 | -33.02 |
|      |                                                                                                                                                                                                                           |                 | g20   | 1.1736  | -4.2259   | 6.5731   | 0.65    |      |        |
|      |                                                                                                                                                                                                                           |                 | theta | 0.9995  | 0.8859    | 1.1130   | <0.0001 |      |        |
| ST25 | $\mu = (\mu_{20} \times \theta^{T-20}) \times e^{-k_S \times (S - S_{opt})^2}$                                                                                                                                            | Non-interactive | Sopt  | 0.6694  | -0.5749   | 1.9137   | 0.26    | 0.52 | -34.29 |
|      |                                                                                                                                                                                                                           |                 | kS    | 8.2553  | -194.4516 | 210.9622 | 0.93    |      |        |
|      |                                                                                                                                                                                                                           |                 | g20   | 0.7449  | -11.4302  | 12.9200  | 0.90    |      |        |
|      |                                                                                                                                                                                                                           |                 | theta | 1.0004  | 0.9014    | 1.0995   | <0.0001 |      |        |
| ST26 | $\mu = \mu_{max} \times \begin{cases} e^{-k_{T1} \times (T - T_{opt})^2} & \text{for } T \leq T_{opt} \\ e^{-k_{T2} \times (T - T_{opt})^2} & \text{for } T > T_{opt} \end{cases} \times e^{-k_S \times (S - S_{opt})^2}$ | Non-interactive | gmax  | 0.7977  | -14.8652  | 16.4607  | 0.91    | 0.52 | -30.35 |
|      |                                                                                                                                                                                                                           |                 | Sopt  | 0.6719  | -0.7588   | 2.1025   | 0.32    |      |        |
|      |                                                                                                                                                                                                                           |                 | kS    | 8.2306  | -235.4385 | 251.8998 | 0.94    |      |        |
|      |                                                                                                                                                                                                                           |                 | Topt  | 16.6194 | -108.7584 | 141.9971 | 0.77    |      |        |
|      |                                                                                                                                                                                                                           |                 | kT1   | 0.0030  | -0.1183   | 0.1243   | 0.96    |      |        |
|      |                                                                                                                                                                                                                           |                 | kT2   | 0.0017  | -0.0599   | 0.0633   | 0.95    |      |        |
| 4    | $\mu = a + b_1 \times S + c_1 \times T + b_2 \times S^2 + c_2 \times T^2$                                                                                                                                                 | Non-interactive | a     | -0.4788 | -2.3141   | 1.3564   | 0.58    | 0.58 | -34.25 |
|      |                                                                                                                                                                                                                           |                 | b1    | -0.6477 | -1.2981   | 0.0026   | 0.05    |      |        |
|      |                                                                                                                                                                                                                           |                 | c1    | 0.1530  | -0.0676   | 0.3736   | 0.15    |      |        |
|      |                                                                                                                                                                                                                           |                 | b2    | 0.0993  | -0.0852   | 0.2839   | 0.26    |      |        |
|      |                                                                                                                                                                                                                           |                 | c2    | -0.0043 | -0.0107   | 0.0020   | 0.16    |      |        |
| 5    | $\mu = a + b_1 \times S + c_1 \times T + b_2 \times S^2 + c_2 \times T^2 + d \times S \times T$                                                                                                                           | Non-interactive | a     | -0.2161 | -2.5808   | 2.1486   | 0.84    | 0.58 | -32.52 |
|      |                                                                                                                                                                                                                           |                 | b1    | -0.8278 | -1.9867   | 0.3312   | 0.14    |      |        |
|      |                                                                                                                                                                                                                           |                 | c1    | 0.1341  | -0.1180   | 0.3861   | 0.26    |      |        |
|      |                                                                                                                                                                                                                           |                 | b2    | 0.0859  | -0.1203   | 0.2922   | 0.38    |      |        |

|  |  |  |    |         |         |        |      |  |  |
|--|--|--|----|---------|---------|--------|------|--|--|
|  |  |  | c2 | -0.0041 | -0.0109 | 0.0026 | 0.20 |  |  |
|  |  |  | d  | 0.0119  | -0.0498 | 0.0735 | 0.68 |  |  |

# Empirical modelling for *Melosira varians*

**Table S7.** Results of empirical modelling the growth rate of *Melosira varians* at various temperature and electrical conductivity

| ID   | Equation                                                                                                                                                                                                                                                                                              | Interaction     | Estimated coefficients |         |                             |                            | <i>p</i> | R <sup>2</sup> | AIC    |
|------|-------------------------------------------------------------------------------------------------------------------------------------------------------------------------------------------------------------------------------------------------------------------------------------------------------|-----------------|------------------------|---------|-----------------------------|----------------------------|----------|----------------|--------|
|      |                                                                                                                                                                                                                                                                                                       |                 | Parameter              | Mean    | Low-95% confidence interval | Up-95% confidence interval |          |                |        |
| ST1  | $\mu = \left( c \times e^{d \times T} \times \left( 1 - \left( \frac{T - z}{w/2} \right)^2 \right) \right) \times e^{-k_S \times (S - S_{opt})^2}$                                                                                                                                                    | Non-interactive | Sopt                   | 0.7009  | 0.5012                      | 0.9007                     | <0.0001  | 0.22           | -38.86 |
|      |                                                                                                                                                                                                                                                                                                       |                 | kS                     | 10.7096 | -25.7643                    | 47.1835                    | 0.53     |                |        |
|      |                                                                                                                                                                                                                                                                                                       |                 | c                      | 9.8975  | -112.3689                   | 132.1639                   | 0.86     |                |        |
|      |                                                                                                                                                                                                                                                                                                       |                 | d                      | -0.1603 | -0.9052                     | 0.5847                     | 0.65     |                |        |
|      |                                                                                                                                                                                                                                                                                                       |                 | z                      | 16.2469 | 9.6120                      | 22.8819                    | <0.0005  |                |        |
|      |                                                                                                                                                                                                                                                                                                       |                 | w                      | 14.0388 | -0.6229                     | 28.7004                    | <0.06    |                |        |
| ST27 | $\mu = \left( c \times e^{d \times T} \times \left( 1 - \left( \frac{T - z}{w/2} \right)^2 \right) \right) \times e^{-k_S \times (1 + a_{ST} \times T) \times (S - S_{opt})^2}$                                                                                                                       | Interactive     | Sopt                   | 0.6952  | 0.4181                      | 0.9724                     | <0.0005  | 0.42           | -42.19 |
|      |                                                                                                                                                                                                                                                                                                       |                 | kS                     | 23.0454 | -42.1546                    | 88.2454                    | 0.45     |                |        |
|      |                                                                                                                                                                                                                                                                                                       |                 | c                      | 0.6979  | -10.5736                    | 11.9695                    | 0.89     |                |        |
|      |                                                                                                                                                                                                                                                                                                       |                 | d                      | -0.0259 | -1.0230                     | 0.9713                     | 0.96     |                |        |
|      |                                                                                                                                                                                                                                                                                                       |                 | z                      | 14.2371 | -36.2649                    | 64.7390                    | 0.55     |                |        |
|      |                                                                                                                                                                                                                                                                                                       |                 | w                      | 21.5227 | -79.4530                    | 122.4984                   | 0.65     |                |        |
|      |                                                                                                                                                                                                                                                                                                       |                 | aST                    | -0.0493 | -0.0528                     | -0.0459                    | <0.0001  |                |        |
| ST28 | $\mu = \left( c \times e^{d \times T} \times \left( 1 - \left( \frac{T - z}{w/2} \right)^2 \right) \right) \times \begin{cases} e^{-k_S \times (S - S_{opt})^2} & \text{for } S \leq S_{opt} \\ e^{-(k_S \times (1 + a_{ST} \times T)) \times (S - S_{opt})^2} & \text{for } S > S_{opt} \end{cases}$ | Interactive     | Sopt                   | 0.6265  | 0.4383                      | 0.8146                     | <0.0001  | 0.44           | -42.85 |
|      |                                                                                                                                                                                                                                                                                                       |                 | kS                     | 20.4467 | -35.3825                    | 76.2759                    | 0.44     |                |        |
|      |                                                                                                                                                                                                                                                                                                       |                 | c                      | 0.7362  | -12.4101                    | 13.8825                    | 0.90     |                |        |
|      |                                                                                                                                                                                                                                                                                                       |                 | d                      | -0.0160 | -1.0697                     | 1.0377                     | 0.97     |                |        |
|      |                                                                                                                                                                                                                                                                                                       |                 | z                      | 14.6268 | -30.5048                    | 59.7584                    | 0.49     |                |        |
|      |                                                                                                                                                                                                                                                                                                       |                 | w                      | 20.7437 | -69.4902                    | 110.9775                   | 0.62     |                |        |
|      |                                                                                                                                                                                                                                                                                                       |                 | aST                    | -0.0492 | -0.0526                     | -0.0458                    | <0.0001  |                |        |
|      |                                                                                                                                                                                                                                                                                                       |                 |                        |         |                             |                            |          |                |        |
| ST5  | $\mu = \mu_{max} \times \left( 1 - \left( \frac{T - T_{opt}}{w/2} \right)^2 \right) \times e^{-k_S \times (S - S_{opt})^2}$                                                                                                                                                                           | Non-interactive | gmax                   | 0.6177  | 0.7566                      | 0.8164                     | 0.43     | 0.20           | -40.51 |
|      |                                                                                                                                                                                                                                                                                                       |                 | Sopt                   | 0.6650  | 0.1179                      | 5.6421                     | <0.0001  |                |        |
|      |                                                                                                                                                                                                                                                                                                       |                 | kS                     | 10.5056 | 15.3963                     | 0.6823                     | 0.51     |                |        |
|      |                                                                                                                                                                                                                                                                                                       |                 | Topt                   | 14.7192 | 3.8790                      | 3.7946                     | <0.005   |                |        |
|      |                                                                                                                                                                                                                                                                                                       |                 | w                      | 17.0222 | 7.1947                      | 2.3659                     | <0.05    |                |        |

|      |                                                                                                                                                                                                                                                                            |                 |       |         |          |          |         |      |        |
|------|----------------------------------------------------------------------------------------------------------------------------------------------------------------------------------------------------------------------------------------------------------------------------|-----------------|-------|---------|----------|----------|---------|------|--------|
| ST29 | $\mu = \mu_{max} \times \left(1 - \left(\frac{T - T_{opt}}{w/2}\right)^2\right) \times e^{-(k_S \times (1 + a_{ST} \times T)) \times (S - S_{opt})^2}$                                                                                                                     | Interactive     | gmax  | 0.4661  | 0.0558   | 0.8763   | <0.05   | 0.31 | -44.10 |
|      |                                                                                                                                                                                                                                                                            |                 | Sopt  | 0.6955  | 0.4175   | 0.9736   | <0.0001 |      |        |
|      |                                                                                                                                                                                                                                                                            |                 | kS    | 22.2406 | -30.2970 | 74.7781  | <0.37   |      |        |
|      |                                                                                                                                                                                                                                                                            |                 | Topt  | 13.3857 | 0.7004   | 26.0710  | <0.05   |      |        |
|      |                                                                                                                                                                                                                                                                            |                 | w     | 23.2249 | -2.1592  | 48.6091  | 0.07    |      |        |
|      |                                                                                                                                                                                                                                                                            |                 | aST   | -0.0493 | -0.0523  | -0.0463  | <0.0001 |      |        |
| ST30 | $\mu = \mu_{max} \times \left(1 - \left(\frac{T - T_{opt}}{w/2}\right)^2\right) \times \begin{cases} e^{-k_S \times (S - S_{opt})^2} & \text{for } S \leq S_{opt} \\ e^{-(k_S \times (1 + a_{ST} \times T)) \times (S - S_{opt})^2} & \text{for } S > S_{opt} \end{cases}$ | Interactive     | gmax  | 0.5710  | 0.2618   | 2.1811   | <0.05   | 0.44 | -44.78 |
|      |                                                                                                                                                                                                                                                                            |                 | Sopt  | 0.6297  | 0.0843   | 7.4710   | <0.0001 |      |        |
|      |                                                                                                                                                                                                                                                                            |                 | kS    | 19.9064 | 18.5801  | 1.0714   | 0.31    |      |        |
|      |                                                                                                                                                                                                                                                                            |                 | Topt  | 14.5019 | 3.6303   | 3.9947   | <0.005  |      |        |
|      |                                                                                                                                                                                                                                                                            |                 | w     | 20.9930 | 7.2639   | 2.8900   | <0.05   |      |        |
|      |                                                                                                                                                                                                                                                                            |                 | aST   | -0.0491 | 0.0013   | -37.3647 | <0.0001 |      |        |
| ST9  | $\mu = \mu_{max} \times \left(1 - \left(\frac{T - T_{opt}}{w/2}\right)^2\right) \times (1 + a \times S)$                                                                                                                                                                   | Non-interactive | gmax  | 0.4424  | 0.0130   | 0.8718   | <0.05   | 0.21 | -42.61 |
|      |                                                                                                                                                                                                                                                                            |                 | a     | -0.4636 | -0.7679  | -0.1593  | <0.01   |      |        |
|      |                                                                                                                                                                                                                                                                            |                 | Topt  | 15.5378 | 9.5430   | 21.5326  | <0.0001 |      |        |
|      |                                                                                                                                                                                                                                                                            |                 | w     | 18.7660 | 3.8308   | 33.7012  | <0.05   |      |        |
| ST31 | $\mu = \mu_{max} \times \left(1 - \left(\frac{T - T_{opt}}{w/2}\right)^2\right) \times (1 + a \times (1 + a_{ST} \times T) \times S)$                                                                                                                                      | Interactive     | gmax  | 0.5720  | 0.2018   | 2.8349   | <0.05   | 0.31 | -43.25 |
|      |                                                                                                                                                                                                                                                                            |                 | a     | -1.2476 | 0.4318   | -2.8893  | <0.05   |      |        |
|      |                                                                                                                                                                                                                                                                            |                 | Topt  | 13.9414 | 5.3215   | 2.6198   | <0.05   |      |        |
|      |                                                                                                                                                                                                                                                                            |                 | w     | 22.4565 | 11.5582  | 1.9429   | 0.07    |      |        |
|      |                                                                                                                                                                                                                                                                            |                 | aST   | -0.0345 | 0.0087   | -3.9466  | <0.005  |      |        |
| ST10 | $\mu = (\mu_{20} \times \theta^{T-20}) \times \left(1 - \left(\frac{S - S_{opt}}{S_{max} - S_{opt}}\right)^2\right)$                                                                                                                                                       | Non-interactive | Sopt  | 0.9647  | -0.9309  | 2.8603   | 0.29    | 0.19 | -42.15 |
|      |                                                                                                                                                                                                                                                                            |                 | Smax  | 2.3719  | 1.3568   | 3.3871   | <0.0005 |      |        |
|      |                                                                                                                                                                                                                                                                            |                 | g20   | 0.1683  | -0.0172  | 0.3537   | 0.07    |      |        |
|      |                                                                                                                                                                                                                                                                            |                 | theta | 0.9977  | 0.8230   | 1.1724   | <0.0001 |      |        |
| ST11 | $\mu = (\mu_{20} \times \theta^{T-20}) \times \left(1 - \left(\frac{S - S_{opt}}{S_{max} \times (1 + a_{ST} \times T) - S_{opt}}\right)^2\right)$                                                                                                                          | Interactive     | Sopt  | 1.1997  | 1.0606   | 1.3387   | <0.0001 | 0.57 | -51.79 |
|      |                                                                                                                                                                                                                                                                            |                 | Smax  | 6.4062  | 3.8139   | 8.9986   | <0.0001 |      |        |
|      |                                                                                                                                                                                                                                                                            |                 | g20   | 0.3011  | 0.1457   | 0.4564   | <0.005  |      |        |
|      |                                                                                                                                                                                                                                                                            |                 | theta | 1.1050  | 0.9782   | 1.2319   | <0.0001 |      |        |
|      |                                                                                                                                                                                                                                                                            |                 | aST   | -0.0289 | -0.0337  | -0.0240  | <0.0001 |      |        |
| ST12 |                                                                                                                                                                                                                                                                            | Non-interactive | gmax  | 0.2704  | -0.0230  | 0.5639   | 0.07    | 0.23 | -41.18 |
|      |                                                                                                                                                                                                                                                                            |                 | Sopt  | 0.8225  | -1.9686  | 3.6136   | 0.54    |      |        |

|       |                                                                                                                                                                                                                                   |                 |       |         |          |         |         |      |        |
|-------|-----------------------------------------------------------------------------------------------------------------------------------------------------------------------------------------------------------------------------------|-----------------|-------|---------|----------|---------|---------|------|--------|
|       | $\mu = \mu_{max} \times \left(1 - \left(\frac{T - T_{opt}}{w/2}\right)^2\right) \times \left(1 - \left(\frac{S - S_{opt}}{S_{max} - S_{opt}}\right)^2\right)$                                                                     |                 | Smax  | 2.5164  | 1.4672   | 3.5657  | <0.0005 |      |        |
|       |                                                                                                                                                                                                                                   |                 | Topt  | 16.8897 | 11.9248  | 21.8545 | <0.0001 |      |        |
|       |                                                                                                                                                                                                                                   |                 | w     | 18.9713 | 3.8990   | 34.0437 | <0.05   |      |        |
| ST 14 | $\mu = \mu_{max} \times e^{-k_T \times (T - T_{opt})^2} \times \left(1 - \left(\frac{S - S_{opt}}{S_{max} - S_{opt}}\right)^2\right)$                                                                                             | Non-interactive | gmax  | 0.5562  | -0.0313  | 1.1437  | 0.06    | 0.28 | -42.44 |
|       |                                                                                                                                                                                                                                   |                 | Sopt  | 0.6749  | -0.1424  | 1.4922  | 0.10    |      |        |
|       |                                                                                                                                                                                                                                   |                 | Smax  | 1.4095  | 1.0967   | 1.7223  | <0.0001 |      |        |
|       |                                                                                                                                                                                                                                   |                 | Topt  | 13.1191 | 11.1943  | 15.0439 | <0.0001 |      |        |
|       |                                                                                                                                                                                                                                   |                 | kT    | 0.0745  | -0.0029  | 0.1520  | 0.06    |      |        |
| ST20  | $\mu = \mu_{max} \times e^{-k_T \times (T - T_{opt})^2} \times (1 + a \times S)$                                                                                                                                                  | Non-interactive | gmax  | 0.4828  | -0.1428  | 1.1084  | 0.12    | 0.19 | -42.36 |
|       |                                                                                                                                                                                                                                   |                 | a     | -0.5014 | -0.8531  | -0.1496 | <0.01   |      |        |
|       |                                                                                                                                                                                                                                   |                 | Topt  | 14.7842 | 8.3267   | 21.2417 | <0.0005 |      |        |
|       |                                                                                                                                                                                                                                   |                 | kT    | 0.0193  | -0.0421  | 0.0807  | 0.51    |      |        |
| ST21  | $\mu = \mu_{max} \times e^{-k_T \times (T - T_{opt})^2} \times (1 + a \times (1 + a_{ST} \times T) \times S)$                                                                                                                     | Interactive     | gmax  | 0.6549  | 0.0038   | 1.3060  | <0.05   | 0.30 | -42.93 |
|       |                                                                                                                                                                                                                                   |                 | a     | -1.2786 | -2.2884  | -0.2687 | <0.05   |      |        |
|       |                                                                                                                                                                                                                                   |                 | Topt  | 14.2074 | 8.1574   | 20.2575 | <0.0005 |      |        |
|       |                                                                                                                                                                                                                                   |                 | kT    | 0.0191  | -0.0260  | 0.0641  | 0.38    |      |        |
|       |                                                                                                                                                                                                                                   |                 | aST   | -0.0345 | -0.0555  | -0.0135 | <0.005  |      |        |
| ST25  | $\mu = (\mu_{20} \times \theta^{T-20}) \times e^{-k_S \times (S - S_{opt})^2}$                                                                                                                                                    | Non-interactive | Sopt  | 0.7950  | 0.5379   | 1.0520  | <0.0001 | 0.17 | -41.72 |
|       |                                                                                                                                                                                                                                   |                 | kS    | 10.1546 | -18.1701 | 38.4792 | 0.45    |      |        |
|       |                                                                                                                                                                                                                                   |                 | g20   | 0.3707  | -0.5337  | 1.2752  | 0.39    |      |        |
|       |                                                                                                                                                                                                                                   |                 | theta | 0.9843  | 0.7747   | 1.1939  | <0.0001 |      |        |
| ST32  | $\mu = (\mu_{20} \times \theta^{T-20}) \times \begin{cases} e^{-k_S \times (S - S_{opt})^2} & \text{for } S \leq S_{opt} \\ e^{-(k_S \times (1 + a_{ST} \times T)) \times (S - S_{opt})^2} & \text{for } S > S_{opt} \end{cases}$ | Interactive     | Sopt  | 0.7315  | 0.4242   | 1.0388  | <0.0005 | 0.22 | 41.02  |
|       |                                                                                                                                                                                                                                   |                 | kS    | 11.6803 | -17.6607 | 41.0212 | 0.41    |      |        |
|       |                                                                                                                                                                                                                                   |                 | g20   | 0.3220  | -0.1691  | 0.8131  | 0.18    |      |        |
|       |                                                                                                                                                                                                                                   |                 | theta | 0.9704  | 0.8098   | 1.1311  | <0.0001 |      |        |
|       |                                                                                                                                                                                                                                   |                 | aST   | -0.0362 | -0.0582  | -0.0142 | <0.005  |      |        |
| 4     | $\mu = a + b_1 \times S + c_1 \times T + b_2 \times S^2 + c_2 \times T^2$                                                                                                                                                         | Non-interactive | a     | -0.7675 | -2.5157  | 0.9808  | 0.36    | 0.26 | -41.89 |
|       |                                                                                                                                                                                                                                   |                 | b1    | 0.2077  | -0.4333  | 0.8488  | 0.50    |      |        |
|       |                                                                                                                                                                                                                                   |                 | c1    | 0.1104  | -0.1008  | 0.3215  | 0.28    |      |        |
|       |                                                                                                                                                                                                                                   |                 | b2    | -0.1053 | -0.2883  | 0.0777  | 0.24    |      |        |
|       |                                                                                                                                                                                                                                   |                 | c2    | -0.0032 | -0.0093  | 0.0028  | 0.27    |      |        |
| 5     | $\mu = a + b_1 \times S + c_1 \times T + b_2 \times S^2 + c_2 \times T^2 + d \times S \times T$                                                                                                                                   | Interactive     | a     | -0.0452 | -1.7954  | 1.7050  | 0.96    | 0.45 | -45.37 |



|  |  |  |    |         |         |        |      |  |  |
|--|--|--|----|---------|---------|--------|------|--|--|
|  |  |  | b1 | -0.5535 | -1.5422 | 0.4353 | 0.25 |  |  |
|  |  |  | c1 | 0.0791  | -0.1141 | 0.2723 | 0.39 |  |  |
|  |  |  | b2 | -0.1438 | -0.3137 | 0.0261 | 0.09 |  |  |
|  |  |  | c2 | -0.0038 | -0.0093 | 0.0017 | 0.16 |  |  |
|  |  |  | d  | 0.0460  | -0.0025 | 0.0945 | 0.06 |  |  |

### Empirical modelling for *Ulnaria acus*

**Table S8.** Results of empirical modelling the growth rate of *Ulnaria acus* at various temperature and electrical conductivity

| ID   | Equation                                                                                                                                                              | Interaction     | Estimated coefficients |         |                             |                            | <i>p</i> | R <sup>2</sup> | AIC    |
|------|-----------------------------------------------------------------------------------------------------------------------------------------------------------------------|-----------------|------------------------|---------|-----------------------------|----------------------------|----------|----------------|--------|
|      |                                                                                                                                                                       |                 | Parameter              | Mean    | Low-95% confidence interval | Up-95% confidence interval |          |                |        |
| ST1  | $\mu = \left( c \times e^{d \times T} \times \left( 1 - \left( \frac{T - z}{w/2} \right)^2 \right) \right) \times e^{-k_S \times (S - S_{opt})^2}$                    | Non-interactive | Sopt                   | 1.1139  | 0.9000                      | 1.3278                     | <0.0001  | 0.63           | -85.89 |
|      |                                                                                                                                                                       |                 | kS                     | 1.7753  | 0.3045                      | 3.2461                     | <0.05    |                |        |
|      |                                                                                                                                                                       |                 | c                      | 0.1400  | -0.4962                     | 0.7762                     | 0.65     |                |        |
|      |                                                                                                                                                                       |                 | d                      | 0.0598  | -0.1566                     | 0.2761                     | 0.57     |                |        |
|      |                                                                                                                                                                       |                 | z                      | 21.1944 | 13.5530                     | 28.8357                    | <0.0001  |                |        |
|      |                                                                                                                                                                       |                 | w                      | 22.4107 | 9.4089                      | 35.4124                    | <0.005   |                |        |
| ST5  | $\mu = \mu_{max} \times \left( 1 - \left( \frac{T - T_{opt}}{w/2} \right)^2 \right) \times e^{-k_S \times (S - S_{opt})^2}$                                           | Non-interactive | gmax                   | 0.5126  | 0.3207                      | 0.7044                     | <0.0001  | 0.62           | -87.46 |
|      |                                                                                                                                                                       |                 | Sopt                   | 1.1098  | 0.8986                      | 1.3210                     | <0.0001  |                |        |
|      |                                                                                                                                                                       |                 | kS                     | 1.7636  | 0.3249                      | 3.2023                     | <0.05    |                |        |
|      |                                                                                                                                                                       |                 | Topt                   | 25.3855 | 14.7656                     | 36.0054                    | <0.0001  |                |        |
|      |                                                                                                                                                                       |                 | w                      | 30.3894 | 6.5777                      | 54.2012                    | <0.05    |                |        |
| ST9  | $\mu = \mu_{max} \times \left( 1 - \left( \frac{T - T_{opt}}{w/2} \right)^2 \right) \times (1 + a \times S)$                                                          | Non-interactive | gmax                   | 0.5382  | 0.1127                      | 4.7770                     | <0.0001  | 0.45           | -80.17 |
|      |                                                                                                                                                                       |                 | a                      | -0.3909 | 0.0575                      | -6.7949                    | <0.0001  |                |        |
|      |                                                                                                                                                                       |                 | Topt                   | 23.2167 | 3.5740                      | 6.4960                     | <0.0001  |                |        |
|      |                                                                                                                                                                       |                 | w                      | 26.5510 | 8.6327                      | 3.0756                     | <0.01    |                |        |
| ST10 | $\mu = (\mu_{20} \times \theta^{T-20}) \times \left( 1 - \left( \frac{S - S_{opt}}{S_{max} - S_{opt}} \right)^2 \right)$                                              | Non-interactive | Sopt                   | 1.0659  | 0.5744                      | 1.5574                     | <0.0005  | 0.52           | -83.31 |
|      |                                                                                                                                                                       |                 | Smax                   | 2.4044  | 2.1342                      | 2.6747                     | <0.0001  |                |        |
|      |                                                                                                                                                                       |                 | g20                    | 0.2182  | 0.1145                      | 0.3219                     | <0.0005  |                |        |
|      |                                                                                                                                                                       |                 | theta                  | 1.0953  | 1.0147                      | 1.1759                     | <0.0001  |                |        |
| ST12 | $\mu = \mu_{max} \times \left( 1 - \left( \frac{T - T_{opt}}{w/2} \right)^2 \right) \times \left( 1 - \left( \frac{S - S_{opt}}{S_{max} - S_{opt}} \right)^2 \right)$ | Non-interactive | gmax                   | 0.4201  | 0.1488                      | 2.8225                     | <0.05    | 0.58           | -84.93 |
|      |                                                                                                                                                                       |                 | Sopt                   | 1.0699  | 0.2164                      | 4.9446                     | <0.0001  |                |        |
|      |                                                                                                                                                                       |                 | Smax                   | 2.4110  | 0.1228                      | 19.6302                    | <0.0001  |                |        |
|      |                                                                                                                                                                       |                 | Topt                   | 30.7213 | 13.5810                     | 2.2621                     | <0.05    |                |        |
|      |                                                                                                                                                                       |                 | w                      | 38.8488 | 28.4200                     | 1.3670                     | 0.19     |                |        |
| ST33 |                                                                                                                                                                       | Interactive     | gmax                   | 0.4144  | 0.3021                      | 0.5266                     | <0.0001  | 0.68           | -89.72 |

|      |                                                                                                                                                                                                                                                   |                 |      |         |         |         |         |      |        |
|------|---------------------------------------------------------------------------------------------------------------------------------------------------------------------------------------------------------------------------------------------------|-----------------|------|---------|---------|---------|---------|------|--------|
|      | $\mu = \mu_{max} \times \left(1 - \left(\frac{T - T_{opt} \times (1 + a_{ST} \times S)}{w/2}\right)^2\right) \times \left(1 - \left(\frac{S - S_{opt}}{S_{max} - S_{opt}}\right)^2\right)$                                                        |                 | Sopt | 1.0940  | 0.7758  | 1.4123  | <0.0001 |      |        |
|      |                                                                                                                                                                                                                                                   |                 | Smax | 2.3372  | 2.1360  | 2.5385  | <0.0001 |      |        |
|      |                                                                                                                                                                                                                                                   |                 | Topt | 21.9813 | 14.8409 | 29.1216 | <0.0001 |      |        |
|      |                                                                                                                                                                                                                                                   |                 | w    | 28.0536 | 11.7264 | 44.3808 | <0.005  |      |        |
|      |                                                                                                                                                                                                                                                   |                 | aST  | 0.0901  | 0.0033  | 0.1768  | <0.05   |      |        |
| ST34 | $\mu = \mu_{max} \times \left(1 - \left(\frac{T - T_{opt}}{w \times (1 + a_{ST} \times S)/2}\right)^2\right) \times \left(1 - \left(\frac{S - S_{opt}}{S_{max} - S_{opt}}\right)^2\right)$                                                        | Interactive     | gmax | 0.4122  | 0.2976  | 0.5269  | <0.0001 | 0.67 | -88.75 |
|      |                                                                                                                                                                                                                                                   |                 | Sopt | 1.1035  | 0.7959  | 1.4111  | <0.0001 |      |        |
|      |                                                                                                                                                                                                                                                   |                 | Smax | 2.3344  | 2.1254  | 2.5435  | <0.0001 |      |        |
|      |                                                                                                                                                                                                                                                   |                 | Topt | 24.9932 | 16.5586 | 33.4278 | <0.0001 |      |        |
|      |                                                                                                                                                                                                                                                   |                 | w    | 33.7671 | 13.2334 | 54.3008 | <0.005  |      |        |
|      |                                                                                                                                                                                                                                                   |                 | aST  | -0.1141 | -0.2029 | -0.0253 | <0.05   |      |        |
| ST14 | $\mu = \mu_{max} \times e^{-k_T \times (T - T_{opt})^2} \times \left(1 - \left(\frac{S - S_{opt}}{S_{max} - S_{opt}}\right)^2\right)$                                                                                                             | Non-interactive | gmax | 0.4609  | 0.2773  | 0.6445  | <0.0001 | 0.61 | -86.65 |
|      |                                                                                                                                                                                                                                                   |                 | Sopt | 1.0714  | 0.6744  | 1.4684  | <0.0001 |      |        |
|      |                                                                                                                                                                                                                                                   |                 | Smax | 2.3671  | 2.1350  | 2.5993  | <0.0001 |      |        |
|      |                                                                                                                                                                                                                                                   |                 | Topt | 24.0609 | 21.1765 | 26.9454 | <0.0001 |      |        |
|      |                                                                                                                                                                                                                                                   |                 | kT   | 0.0182  | -0.0021 | 0.0384  | 0.08    |      |        |
| ST35 | $\mu = \mu_{max} \times e^{-k_T \times (T - T_{opt} \times (1 + a_{ST} \times S))^2} \times \left(1 - \left(\frac{S - S_{opt}}{S_{max} - S_{opt}}\right)^2\right)$                                                                                | Interactive     | gmax | 0.5160  | 0.3603  | 0.6717  | <0.0001 | 0.74 | -94.70 |
|      |                                                                                                                                                                                                                                                   |                 | Sopt | 1.0790  | 0.7930  | 1.3650  | <0.0001 |      |        |
|      |                                                                                                                                                                                                                                                   |                 | Smax | 2.2884  | 2.0209  | 2.5559  | <0.0001 |      |        |
|      |                                                                                                                                                                                                                                                   |                 | Topt | 17.1164 | 12.2437 | 21.9892 | <0.0001 |      |        |
|      |                                                                                                                                                                                                                                                   |                 | kT   | 0.0151  | 0.0007  | 0.0295  | <0.05   |      |        |
|      |                                                                                                                                                                                                                                                   |                 | aST  | 0.3433  | 0.0059  | 0.6807  | <0.05   |      |        |
| ST16 | $\mu = \mu_{max} \times \left(1 - \left(\frac{T - T_{opt}}{w/2}\right)^2\right) \times \begin{cases} e^{-k_{S1} \times (S - S_{opt})^2} & \text{for } S \leq S_{opt} \\ e^{-k_{S2} \times (S - S_{opt})^2} & \text{for } S > S_{opt} \end{cases}$ | Non-interactive | gmax | 0.5004  | 0.2844  | 0.7164  | 0.0001  | 0.65 | -87.68 |
|      |                                                                                                                                                                                                                                                   |                 | Sopt | 1.4053  | 0.9841  | 1.8264  | <0.0001 |      |        |
|      |                                                                                                                                                                                                                                                   |                 | kS1  | 0.6698  | -0.6005 | 1.9401  | 0.28    |      |        |
|      |                                                                                                                                                                                                                                                   |                 | kS2  | 5.2452  | -6.2038 | 16.6942 | 0.35    |      |        |
|      |                                                                                                                                                                                                                                                   |                 | Topt | 24.3653 | 16.4759 | 32.2547 | <0.0001 |      |        |
|      |                                                                                                                                                                                                                                                   |                 | w    | 28.5753 | 10.3970 | 46.7535 | <0.005  |      |        |
| ST17 |                                                                                                                                                                                                                                                   | Interactive     | gmax | 0.4829  | 0.2867  | 0.6790  | <0.0001 | 0.71 | -90.30 |
|      |                                                                                                                                                                                                                                                   |                 | Sopt | 1.4185  | 0.9223  | 1.9147  | <0.0001 |      |        |
|      |                                                                                                                                                                                                                                                   |                 | kS1  | 0.7024  | -0.5589 | 1.9637  | 0.26    |      |        |
|      |                                                                                                                                                                                                                                                   |                 | kS2  | 3.8025  | -4.9454 | 12.5504 | 0.37    |      |        |

|      |                                                                                                                                                                                                                                                                                                                                                                                |                 |      |         |          |          |         |      |        |
|------|--------------------------------------------------------------------------------------------------------------------------------------------------------------------------------------------------------------------------------------------------------------------------------------------------------------------------------------------------------------------------------|-----------------|------|---------|----------|----------|---------|------|--------|
|      | $\mu = \mu_{max} \times \left(1 - \left(\frac{T - T_{opt}}{w \times (1 + a_{ST} \times S)/2}\right)^2\right)$ $\times \begin{cases} e^{-k_{S1} \times (S - S_{opt})^2} & \text{for } S \leq S_{opt} \\ e^{-k_{S2} \times (S - S_{opt})^2} & \text{for } S > S_{opt} \end{cases}$                                                                                               |                 | Topt | 26.6723 | 14.4455  | 38.8992  | <0.0005 |      |        |
|      |                                                                                                                                                                                                                                                                                                                                                                                |                 | w    | 55.5781 | 8.9274   | 102.2287 | <0.05   |      |        |
|      |                                                                                                                                                                                                                                                                                                                                                                                |                 | aST  | -0.2959 | -0.2983  | -0.2935  | <0.0001 |      |        |
| ST36 | $\mu = \mu_{max} \times \left(1 - \left(\frac{T - T_{opt}}{w/2}\right)^2\right)$ $\times \begin{cases} e^{-k_{S1} \times (S - S_{opt})^2} & \text{for } S \leq S_{opt} \\ e^{-(k_{S2} \times (1 + a_{ST} \times T)) \times (S - S_{opt})^2} & \text{for } S > S_{opt} \end{cases}$                                                                                             | Interactive     | gmax | 0.4929  | 0.2645   | 0.7213   | <0.0005 | 0.68 | -87.56 |
|      |                                                                                                                                                                                                                                                                                                                                                                                |                 | Sopt | 1.4313  | 1.0258   | 1.8367   | <0.0001 |      |        |
|      |                                                                                                                                                                                                                                                                                                                                                                                |                 | kS1  | 0.5814  | -0.5494  | 1.7123   | 0.29    |      |        |
|      |                                                                                                                                                                                                                                                                                                                                                                                |                 | kS2  | 21.6426 | -55.8491 | 99.1343  | 0.56    |      |        |
|      |                                                                                                                                                                                                                                                                                                                                                                                |                 | Topt | 22.8616 | 17.0034  | 28.7197  | <0.0001 |      |        |
|      |                                                                                                                                                                                                                                                                                                                                                                                |                 | w    | 26.6421 | 12.0932  | 41.1911  | <0.005  |      |        |
|      |                                                                                                                                                                                                                                                                                                                                                                                |                 | aST  | -0.0310 | -0.0506  | -0.0113  | <0.005  |      |        |
| ST18 | $\mu = \mu_{max} \times e^{-k_T \times (T - T_{opt})^2} \times \begin{cases} e^{-k_{S1} \times (S - S_{opt})^2} & \text{for } S \leq S_{opt} \\ e^{-k_{S2} \times (S - S_{opt})^2} & \text{for } S > S_{opt} \end{cases}$                                                                                                                                                      | Non-interactive | gmax | 0.5744  | 0.2948   | 0.8541   | <0.0005 | 0.67 | -88.67 |
|      |                                                                                                                                                                                                                                                                                                                                                                                |                 | Sopt | 1.4137  | 1.0174   | 1.8100   | <0.0001 |      |        |
|      |                                                                                                                                                                                                                                                                                                                                                                                |                 | kS1  | 0.6544  | -0.5520  | 1.8608   | 0.27    |      |        |
|      |                                                                                                                                                                                                                                                                                                                                                                                |                 | kS2  | 5.6557  | -6.2633  | 17.5747  | 0.33    |      |        |
|      |                                                                                                                                                                                                                                                                                                                                                                                |                 | Topt | 23.2647 | 20.4988  | 26.0307  | <0.0001 |      |        |
|      |                                                                                                                                                                                                                                                                                                                                                                                |                 | kT   | 0.0143  | -0.0024  | 0.0311   | 0.09    |      |        |
| ST37 | $\mu = \mu_{max} \times \begin{cases} e^{-k_T \times (T - T_{opt})^2} & \text{for } T \leq T_{opt} \\ e^{-(k_T \times (1 + a_{ST} \times S)) \times (T - T_{opt})^2} & \text{for } T > T_{opt} \end{cases}$ $\times \begin{cases} e^{-k_{S1} \times (S - S_{opt})^2} & \text{for } S \leq S_{opt} \\ e^{-k_{S2} \times (S - S_{opt})^2} & \text{for } S > S_{opt} \end{cases}$ | Interactive     | gmax | 0.5408  | 0.2678   | 0.8137   | <0.001  | 0.69 | -88.43 |
|      |                                                                                                                                                                                                                                                                                                                                                                                |                 | Sopt | 1.3200  | 0.8528   | 1.7872   | <0.0001 |      |        |
|      |                                                                                                                                                                                                                                                                                                                                                                                |                 | kS1  | 0.4401  | -0.7854  | 1.6657   | 0.46    |      |        |
|      |                                                                                                                                                                                                                                                                                                                                                                                |                 | kS2  | 4.5380  | -4.4478  | 13.5238  | 0.30    |      |        |
|      |                                                                                                                                                                                                                                                                                                                                                                                |                 | Topt | 20.9279 | 18.0254  | 23.8305  | <0.0001 |      |        |
|      |                                                                                                                                                                                                                                                                                                                                                                                |                 | kT   | 0.0265  | -0.0016  | 0.0545   | 0.06    |      |        |
|      |                                                                                                                                                                                                                                                                                                                                                                                |                 | aST  | -0.6768 | -1.1140  | -0.2395  | <0.005  |      |        |
| ST38 | $\mu = \mu_{max} \times e^{-k_T \times (T - T_{opt})^2} \times \begin{cases} e^{-k_{S1} \times (S - S_{opt})^2} & \text{for } S \leq S_{opt} \\ e^{-(k_{S2} \times (1 + a_{ST} \times T)) \times (S - S_{opt})^2} & \text{for } S > S_{opt} \end{cases}$                                                                                                                       | Interactive     | gmax | 0.5707  | 0.2903   | 0.8512   | <0.0005 | 0.70 | -89.24 |
|      |                                                                                                                                                                                                                                                                                                                                                                                |                 | Sopt | 1.4354  | 1.0540   | 1.8169   | <0.0001 |      |        |
|      |                                                                                                                                                                                                                                                                                                                                                                                |                 | kS1  | 0.5745  | -0.4984  | 1.6473   | 0.28    |      |        |
|      |                                                                                                                                                                                                                                                                                                                                                                                |                 | kS2  | 24.0221 | -55.9700 | 104.0143 | 0.54    |      |        |
|      |                                                                                                                                                                                                                                                                                                                                                                                |                 | Topt | 22.5906 | 19.9116  | 25.2697  | <0.0001 |      |        |
|      |                                                                                                                                                                                                                                                                                                                                                                                |                 | kT   | 0.0146  | -0.0013  | 0.0306   | 0.07    |      |        |
|      |                                                                                                                                                                                                                                                                                                                                                                                |                 | aST  | -0.0318 | -0.0487  | -0.0149  | <0.001  |      |        |

|      |                                                                                                                                                                                                                                                                              |                     |       |         |         |         |         |      |        |
|------|------------------------------------------------------------------------------------------------------------------------------------------------------------------------------------------------------------------------------------------------------------------------------|---------------------|-------|---------|---------|---------|---------|------|--------|
| ST19 | $\mu = \mu_{max} \times e^{-k_T \times (T - T_{opt})^2} \times e^{-k_S \times (S - S_{opt})^2}$                                                                                                                                                                              | Non-<br>interactive | gmax  | 0.5798  | 0.3263  | 0.8333  | 0.0001  | 0.63 | -88.08 |
|      |                                                                                                                                                                                                                                                                              |                     | Sopt  | 1.1072  | 0.9012  | 1.3132  | <0.0001 |      |        |
|      |                                                                                                                                                                                                                                                                              |                     | kS    | 1.7919  | 0.3716  | 3.2123  | <0.05   |      |        |
|      |                                                                                                                                                                                                                                                                              |                     | Topt  | 23.7021 | 20.4429 | 26.9613 | <0.0001 |      |        |
|      |                                                                                                                                                                                                                                                                              |                     | kT    | 0.0136  | -0.0042 | 0.0315  | 0.13    |      |        |
| ST39 | $\mu = \mu_{max} \times \begin{cases} e^{-k_T \times (T - T_{opt})^2} & \text{for } T \leq T_{opt} \\ e^{-(k_T \times (1 + a_{ST} \times S)) \times (T - T_{opt})^2} & \text{for } T > T_{opt} \end{cases} \times e^{-k_S \times (S - S_{opt})^2}$                           | Interactive         | gmax  | 0.5640  | 0.3092  | 0.8188  | <0.0005 | 0.66 | -88.09 |
|      |                                                                                                                                                                                                                                                                              |                     | Sopt  | 0.9640  | 0.6789  | 1.2491  | <0.0001 |      |        |
|      |                                                                                                                                                                                                                                                                              |                     | kS    | 1.7272  | 0.3305  | 3.1239  | <0.05   |      |        |
|      |                                                                                                                                                                                                                                                                              |                     | Topt  | 20.8431 | 17.8762 | 23.8099 | <0.0001 |      |        |
|      |                                                                                                                                                                                                                                                                              |                     | kT    | 0.0272  | -0.0021 | 0.0564  | 0.07    |      |        |
|      |                                                                                                                                                                                                                                                                              |                     | aST   | -0.7481 | -1.1783 | -0.3179 | <0.005  |      |        |
| ST20 | $\mu = \mu_{max} \times e^{-k_T \times (T - T_{opt})^2} \times (1 + a \times S)$                                                                                                                                                                                             | Non-<br>interactive | gmax  | 0.6201  | 0.2860  | 0.9541  | <0.001  | 0.46 | -80.50 |
|      |                                                                                                                                                                                                                                                                              |                     | a     | -0.3976 | -0.5182 | -0.2770 | <0.0001 |      |        |
|      |                                                                                                                                                                                                                                                                              |                     | Topt  | 22.6926 | 19.2135 | 26.1716 | <0.0001 |      |        |
|      |                                                                                                                                                                                                                                                                              |                     | kT    | 0.0141  | -0.0067 | 0.0349  | 0.17    |      |        |
| ST22 | $\mu = \mu_{max} \times e^{-(k_T \times (1 + a_{ST} \times S)) \times (T - T_{opt})^2} \times (1 + a \times S)$                                                                                                                                                              | Interactive         | gmax  | 0.6555  | 0.3010  | 1.0100  | <0.001  | 0.47 | -78.93 |
|      |                                                                                                                                                                                                                                                                              |                     | a     | -0.3984 | -0.5056 | -0.2912 | <0.0001 |      |        |
|      |                                                                                                                                                                                                                                                                              |                     | Topt  | 22.3147 | 19.4505 | 25.1788 | <0.0001 |      |        |
|      |                                                                                                                                                                                                                                                                              |                     | kT    | 0.0220  | -0.0104 | 0.0544  | 0.17    |      |        |
|      |                                                                                                                                                                                                                                                                              |                     | aST   | -0.2246 | -0.8248 | 0.3756  | 0.44    |      |        |
| ST23 | $\mu = \mu_{max} \times \begin{cases} e^{-k_T \times (T - T_{opt})^2} & \text{for } T \leq T_{opt} \\ e^{-(k_T \times (1 + a_{ST} \times S)) \times (T - T_{opt})^2} & \text{for } T > T_{opt} \end{cases} \times (1 + a \times S)$                                          | Interactive         | gmax  | 0.6462  | 0.3717  | 0.9208  | <0.0001 | 0.63 | -87.97 |
|      |                                                                                                                                                                                                                                                                              |                     | a     | -0.4063 | -0.4428 | -0.3699 | <0.0001 |      |        |
|      |                                                                                                                                                                                                                                                                              |                     | Topt  | 20.4412 | 18.2130 | 22.6694 | <0.0001 |      |        |
|      |                                                                                                                                                                                                                                                                              |                     | kT    | 0.0279  | 0.0042  | 0.0515  | <0.05   |      |        |
|      |                                                                                                                                                                                                                                                                              |                     | aST   | -0.7746 | -1.1365 | -0.4127 | <0.0005 |      |        |
| ST25 | $\mu = (\mu_{20} \times \theta^{T-20}) \times e^{-k_S \times (S - S_{opt})^2}$                                                                                                                                                                                               | Non-<br>interactive | Sopt  | 1.1107  | 0.8856  | 1.3357  | <0.0001 | 0.55 | -85.18 |
|      |                                                                                                                                                                                                                                                                              |                     | kS    | 1.8729  | 0.2306  | 3.5152  | <0.05   |      |        |
|      |                                                                                                                                                                                                                                                                              |                     | g20   | 0.3342  | 0.1703  | 0.4980  | <0.0005 |      |        |
|      |                                                                                                                                                                                                                                                                              |                     | theta | 1.0716  | 1.0009  | 1.1422  | <0.0001 |      |        |
| ST40 | $\mu = \left( c \times e^{d \times T} \times \left( 1 - \left( \frac{T - z}{w/2} \right)^2 \right) \right) \times \begin{cases} e^{-k_{S1} \times (S - S_{opt})^2} & \text{for } S \leq S_{opt} \\ e^{-k_{S2} \times (S - S_{opt})^2} & \text{for } S > S_{opt} \end{cases}$ | Non-<br>interactive | Sopt  | 1.4103  | 0.2021  | 6.9778  | <0.0001 | 0.66 | -86.24 |
|      |                                                                                                                                                                                                                                                                              |                     | kS1   | 0.6720  | 0.6141  | 1.0943  | 0.29    |      |        |
|      |                                                                                                                                                                                                                                                                              |                     | kS2   | 5.3392  | 5.6106  | 0.9516  | 0.35    |      |        |

|      |                                                                                                                                                                                                                                                                                                       |                 |       |         |          |          |         |      |        |
|------|-------------------------------------------------------------------------------------------------------------------------------------------------------------------------------------------------------------------------------------------------------------------------------------------------------|-----------------|-------|---------|----------|----------|---------|------|--------|
|      |                                                                                                                                                                                                                                                                                                       |                 | c     | 0.1439  | 0.2841   | 0.5063   | 0.62    |      |        |
|      |                                                                                                                                                                                                                                                                                                       |                 | d     | 0.0588  | 0.0946   | 0.6214   | 0.54    |      |        |
|      |                                                                                                                                                                                                                                                                                                       |                 | z     | 20.8947 | 3.1121   | 6.7140   | <0.0001 |      |        |
|      |                                                                                                                                                                                                                                                                                                       |                 | w     | 22.1589 | 5.0735   | 4.3676   | <0.0005 |      |        |
| ST41 | $\mu = \left( c \times e^{d \times T} \times \left( 1 - \left( \frac{T-z}{w/2} \right)^2 \right) \right)$ $\times \begin{cases} e^{-k_{S1} \times (S-S_{opt})^2} & \text{for } S \leq S_{opt} \\ e^{-(k_{S2} \times (1+a_{ST} \times T)) \times (S-S_{opt})^2} & \text{for } S > S_{opt} \end{cases}$ | Interactive     | Sopt  | 1.4375  | 1.0286   | 1.8464   | <0.0001 | 0.69 | -86.34 |
|      |                                                                                                                                                                                                                                                                                                       |                 | kS1   | 0.5832  | -0.5644  | 1.7309   | 0.30    |      |        |
|      |                                                                                                                                                                                                                                                                                                       |                 | kS2   | 22.9481 | -59.7759 | 105.6721 | 0.57    |      |        |
|      |                                                                                                                                                                                                                                                                                                       |                 | c     | 0.1348  | -0.4245  | 0.6942   | 0.62    |      |        |
|      |                                                                                                                                                                                                                                                                                                       |                 | d     | 0.0632  | -0.1365  | 0.2629   | 0.51    |      |        |
|      |                                                                                                                                                                                                                                                                                                       |                 | z     | 20.0013 | 13.3508  | 26.6518  | <0.0001 |      |        |
|      |                                                                                                                                                                                                                                                                                                       |                 | w     | 22.4198 | 13.6289  | 31.2107  | <0.0001 |      |        |
|      |                                                                                                                                                                                                                                                                                                       |                 | aST   | -0.0314 | -0.0507  | -0.0121  | <0.005  |      |        |
| ST42 | $\mu = (\mu_{20} \times \theta^{T-20}) \times \begin{cases} e^{-k_{S1} \times (S-S_{opt})^2} & \text{for } S \leq S_{opt} \\ e^{-k_{S2} \times (S-S_{opt})^2} & \text{for } S > S_{opt} \end{cases}$                                                                                                  | Non-interactive | Sopt  | 1.3703  | 0.9185   | 1.8221   | <0.0001 | 0.58 | -84.54 |
|      |                                                                                                                                                                                                                                                                                                       |                 | kS1   | 0.8330  | -0.7334  | 2.3993   | 0.28    |      |        |
|      |                                                                                                                                                                                                                                                                                                       |                 | kS2   | 5.1125  | -7.3548  | 17.5798  | 0.40    |      |        |
|      |                                                                                                                                                                                                                                                                                                       |                 | g20   | 0.3438  | 0.1644   | 0.5232   | <0.001  |      |        |
|      |                                                                                                                                                                                                                                                                                                       |                 | theta | 1.0661  | 0.9990   | 1.1332   | <0.0001 |      |        |
| ST43 | $\mu = (\mu_{20} \times \theta^{T-20}) \times \begin{cases} e^{-k_{S1} \times (S-S_{opt})^2} & \text{for } S \leq S_{opt} \\ e^{-(k_{S2} \times (1+a_{ST} \times T)) \times (S-S_{opt})^2} & \text{for } S > S_{opt} \end{cases}$                                                                     | Interactive     | Sopt  | 1.4036  | 0.9287   | 1.8786   | <0.0001 | 0.60 | -84.32 |
|      |                                                                                                                                                                                                                                                                                                       |                 | kS1   | 0.6944  | -0.7087  | 2.0975   | 0.31    |      |        |
|      |                                                                                                                                                                                                                                                                                                       |                 | kS2   | 18.0529 | -61.4811 | 97.5869  | 0.64    |      |        |
|      |                                                                                                                                                                                                                                                                                                       |                 | g20   | 0.3522  | 0.1644   | 0.5400   | <0.001  |      |        |
|      |                                                                                                                                                                                                                                                                                                       |                 | theta | 1.0497  | 0.9804   | 1.1190   | <0.0001 |      |        |
|      |                                                                                                                                                                                                                                                                                                       |                 | aST   | -0.0294 | -0.0557  | -0.0030  | <0.05   |      |        |
| ST44 | $\mu = \mu_{max} \times \begin{cases} e^{-k_{T1} \times (T-T_{opt})^2} & \text{for } T \leq T_{opt} \\ e^{-k_{T2} \times (T-T_{opt})^2} & \text{for } T > T_{opt} \end{cases} \times e^{-k_S \times (S-S_{opt})^2}$                                                                                   | Non-interactive | gmax  | 0.5295  | 0.1987   | 0.8602   | <0.005  | 0.64 | -86.77 |
|      |                                                                                                                                                                                                                                                                                                       |                 | Sopt  | 1.0945  | 0.8858   | 1.3032   | <0.0001 |      |        |
|      |                                                                                                                                                                                                                                                                                                       |                 | kS    | 1.7912  | 0.3700   | 3.2124   | <0.05   |      |        |
|      |                                                                                                                                                                                                                                                                                                       |                 | Topt  | 20.3877 | -2.0796  | 42.8551  | 0.07    |      |        |
|      |                                                                                                                                                                                                                                                                                                       |                 | kT1   | 0.0358  | -0.2468  | 0.3183   | 0.79    |      |        |
|      |                                                                                                                                                                                                                                                                                                       |                 | kT2   | 0.0015  | -0.0205  | 0.0236   | 0.89    |      |        |
| ST45 |                                                                                                                                                                                                                                                                                                       | Non-interactive | gmax  | 0.5349  | 0.2325   | 0.8372   | <0.005  | 0.68 | -87.48 |
|      |                                                                                                                                                                                                                                                                                                       |                 | Sopt  | 1.4061  | 1.0054   | 1.8068   | <0.0001 |      |        |
|      |                                                                                                                                                                                                                                                                                                       |                 | kS1   | 0.6458  | -0.5638  | 1.8554   | 0.28    |      |        |

|      |                                                                                                                                                                                                                                                                                                                                                                                                                    |                 |       |         |           |          |         |      |        |
|------|--------------------------------------------------------------------------------------------------------------------------------------------------------------------------------------------------------------------------------------------------------------------------------------------------------------------------------------------------------------------------------------------------------------------|-----------------|-------|---------|-----------|----------|---------|------|--------|
|      | $\mu = \mu_{max} \times \begin{cases} e^{-2.3 \times \left( \frac{T-T_{opt}}{T_{low}-T_{opt}} \right)^2} & \text{for } T \leq T_{opt} \\ e^{-2.3 \times \left( \frac{T-T_{opt}}{T_{high}-T_{opt}} \right)^2} & \text{for } T > T_{opt} \end{cases}$ $\times \begin{cases} e^{-k_{S1} \times (S-S_{opt})^2} & \text{for } S \leq S_{opt} \\ e^{-k_{S2} \times (S-S_{opt})^2} & \text{for } S > S_{opt} \end{cases}$ |                 | kS2   | 5.6009  | -6.3413   | 17.5431  | 0.34    |      |        |
|      |                                                                                                                                                                                                                                                                                                                                                                                                                    |                 | Topt  | 20.2828 | 0.0966    | 40.4690  | <0.05   |      |        |
|      |                                                                                                                                                                                                                                                                                                                                                                                                                    |                 | Tlow  | 12.3246 | 2.3590    | 22.2902  | <0.05   |      |        |
|      |                                                                                                                                                                                                                                                                                                                                                                                                                    |                 | Thigh | 48.5449 | -54.5579  | 151.6477 | 0.34    |      |        |
| ST46 | $\mu = \mu_{max} \times \begin{cases} e^{-2.3 \times \left( \frac{T-T_{opt}}{T_{low}-T_{opt}} \right)^2} & \text{for } T \leq T_{opt} \\ e^{-2.3 \times \left( \frac{T-T_{opt}}{T_{high}-T_{opt}} \right)^2} & \text{for } T > T_{opt} \end{cases} \times e^{-k_S \times (S-S_{opt})^2}$                                                                                                                           | Non-interactive | gmax  | 0.5294  | 0.1987    | 0.8602   | <0.005  | 0.64 | -86.77 |
|      |                                                                                                                                                                                                                                                                                                                                                                                                                    |                 | Sopt  | 1.0945  | 0.8858    | 1.3032   | <0.0001 |      |        |
|      |                                                                                                                                                                                                                                                                                                                                                                                                                    |                 | kS    | 1.7912  | 0.3700    | 3.2124   | <0.05   |      |        |
|      |                                                                                                                                                                                                                                                                                                                                                                                                                    |                 | Topt  | 20.3874 | -2.0884   | 42.8632  | 0.07    |      |        |
|      |                                                                                                                                                                                                                                                                                                                                                                                                                    |                 | Tlow  | 12.3679 | 2.0638    | 22.6720  | <0.05   |      |        |
|      |                                                                                                                                                                                                                                                                                                                                                                                                                    |                 | Thigh | 59.3284 | -205.2985 | 323.9552 | 0.64    |      |        |
| 4    | $\mu = a + b_1 \times S + c_1 \times T + b_2 \times S^2 + c_2 \times T^2$                                                                                                                                                                                                                                                                                                                                          | Non-interactive | a     | -0.6098 | -1.4728   | 0.2532   | 0.16    | 0.51 | -80.87 |
|      |                                                                                                                                                                                                                                                                                                                                                                                                                    |                 | b1    | 0.0178  | -0.3352   | 0.3709   | 0.92    |      |        |
|      |                                                                                                                                                                                                                                                                                                                                                                                                                    |                 | c1    | 0.0858  | -0.0068   | 0.1784   | 0.07    |      |        |
|      |                                                                                                                                                                                                                                                                                                                                                                                                                    |                 | b2    | -0.0555 | -0.1587   | 0.0477   | 0.28    |      |        |
|      |                                                                                                                                                                                                                                                                                                                                                                                                                    |                 | c2    | -0.0019 | -0.0043   | 0.0005   | 0.11    |      |        |
| 5    | $\mu = a + b_1 \times S + c_1 \times T + b_2 \times S^2 + c_2 \times T^2 + d \times S \times T$                                                                                                                                                                                                                                                                                                                    | Interactive     | a     | -0.7052 | -1.6648   | 0.2544   | 0.14    | 0.52 | -79.24 |
|      |                                                                                                                                                                                                                                                                                                                                                                                                                    |                 | b1    | 0.1178  | -0.4181   | 0.6536   | 0.65    |      |        |
|      |                                                                                                                                                                                                                                                                                                                                                                                                                    |                 | c1    | 0.0879  | -0.0070   | 0.1829   | 0.07    |      |        |
|      |                                                                                                                                                                                                                                                                                                                                                                                                                    |                 | b2    | -0.0606 | -0.1680   | 0.0468   | 0.25    |      |        |
|      |                                                                                                                                                                                                                                                                                                                                                                                                                    |                 | c2    | -0.0018 | -0.0042   | 0.0007   | 0.15    |      |        |
|      |                                                                                                                                                                                                                                                                                                                                                                                                                    |                 | d     | -0.0043 | -0.0212   | 0.0127   | 0.60    |      |        |

### Empirical modelling for *Navicula gregaria*

**Table S9.** Results of empirical modelling the growth rate of *Navicula gregaria* at various temperature and electrical conductivity.

| ID   | Equation                                                                                                                                                 | Interaction     | Estimated coefficients |         |                             |                            | p       | R <sup>2</sup> | AIC     |
|------|----------------------------------------------------------------------------------------------------------------------------------------------------------|-----------------|------------------------|---------|-----------------------------|----------------------------|---------|----------------|---------|
|      |                                                                                                                                                          |                 | Parameter              | Mean    | Low-95% confidence interval | Up-95% confidence interval |         |                |         |
| ST1  | $\mu = \left( c \times e^{d \times T} \times \left( 1 - \left( \frac{T - z}{w/2} \right)^2 \right) \right) \times e^{-k_S \times (S - S_{opt})^2}$       | Non-interactive | Sopt                   | 2.1278  | 0.2914                      | 3.9642                     | <0.05   | 0.86           | -229.82 |
|      |                                                                                                                                                          |                 | kS                     | 0.0143  | 0.0035                      | 0.0252                     | <0.05   |                |         |
|      |                                                                                                                                                          |                 | c                      | 0.2905  | -0.0151                     | 0.5960                     | 0.06    |                |         |
|      |                                                                                                                                                          |                 | d                      | 0.0469  | -0.0217                     | 0.1155                     | 0.17    |                |         |
|      |                                                                                                                                                          |                 | Topt                   | 14.0473 | 9.7561                      | 18.3385                    | <0.0001 |                |         |
|      |                                                                                                                                                          |                 | w                      | 22.4574 | 14.1012                     | 30.8135                    | <0.0001 |                |         |
| ST3  | $\mu = \left( c \times e^{d \times T} \times \left( 1 - \left( \frac{T - z}{w/2} \right)^2 \right) \right) \times \frac{Stox^2}{Stox^2 + S^2}$           | Non-interactive | Stox                   | 9.0106  | 6.6543                      | 11.3668                    | <0.0001 | 0.82           | -218.52 |
|      |                                                                                                                                                          |                 | c                      | 0.2965  | -0.0605                     | 0.6536                     | 0.10    |                |         |
|      |                                                                                                                                                          |                 | d                      | 0.0479  | -0.0312                     | 0.1269                     | 0.23    |                |         |
|      |                                                                                                                                                          |                 | Topt                   | 13.9489 | 8.8530                      | 19.0449                    | <0.0001 |                |         |
| ST5  | $\mu = \mu_{max} \times \left( 1 - \left( \frac{T - T_{opt}}{w/2} \right)^2 \right) \times e^{-k_S \times (S - S_{opt})^2}$                              | Non-interactive | gmax                   | 0.6215  | 0.5687                      | 0.6743                     | <0.0001 | 0.86           | -228.92 |
|      |                                                                                                                                                          |                 | Sopt                   | 2.1486  | 0.3365                      | 3.9608                     | <0.05   |                |         |
|      |                                                                                                                                                          |                 | kS                     | 0.0148  | 0.0035                      | 0.0261                     | <0.05   |                |         |
|      |                                                                                                                                                          |                 | Topt                   | 15.8391 | 15.3257                     | 16.3525                    | <0.0001 |                |         |
|      |                                                                                                                                                          |                 | w                      | 19.2565 | 17.8957                     | 20.6173                    | <0.0001 |                |         |
| ST15 | $\mu = \mu_{max} \times \left( 1 - \left( \frac{T - T_{opt}}{w \times (1 + a_{ST} \times S)/2} \right)^2 \right) \times e^{-k_S \times (S - S_{opt})^2}$ | Interactive     | gmax                   | 0.5918  | 0.4638                      | 0.7198                     | <0.0001 | 0.57           | -173.43 |
|      |                                                                                                                                                          |                 | Sopt                   | 3.6056  | 2.8524                      | 4.3588                     | <0.0001 |                |         |
|      |                                                                                                                                                          |                 | kS                     | 0.0416  | 0.0166                      | 0.0666                     | <0.005  |                |         |
|      |                                                                                                                                                          |                 | Topt                   | 15.8663 | 14.1372                     | 17.5955                    | <0.0001 |                |         |
|      |                                                                                                                                                          |                 | w                      | 34.8507 | 25.1704                     | 44.5310                    | <0.0001 |                |         |
|      |                                                                                                                                                          |                 | aST                    | -0.0759 | -0.0845                     | -0.0673                    | <0.0001 |                |         |
| ST6  | $\mu = \mu_{max} \times \left( 1 - \left( \frac{T - T_{opt}}{w/2} \right)^2 \right) \times \frac{S_{tox}^2}{S_{tox}^2 + S^2}$                            | Non-interactive | gmax                   | 0.6427  | 0.5772                      | 0.7082                     | <0.0001 | 0.81           | -218.23 |
|      |                                                                                                                                                          |                 | Stox                   | 8.9467  | 6.5930                      | 11.3004                    | <0.0001 |                |         |
|      |                                                                                                                                                          |                 | Topt                   | 15.8077 | 15.2285                     | 16.3870                    | <0.0001 |                |         |
|      |                                                                                                                                                          |                 | w                      | 19.2604 | 17.7325                     | 20.7883                    | <0.0001 |                |         |



|      |                                                                                                                                                                                                                           |                 |       |         |         |         |         |      |         |
|------|---------------------------------------------------------------------------------------------------------------------------------------------------------------------------------------------------------------------------|-----------------|-------|---------|---------|---------|---------|------|---------|
| ST8  | $\mu = \left( c \times e^{d \times T} \times \left( 1 - \left( \frac{T - z}{w/2} \right)^2 \right) \right) \times (1 + a \times S)$                                                                                       | Non-interactive | a     | -0.0604 | -0.0688 | -0.0519 | <0.0001 | 0.86 | -229.79 |
|      |                                                                                                                                                                                                                           |                 | c     | 0.3145  | -0.0193 | 0.6484  | 0.06    |      |         |
|      |                                                                                                                                                                                                                           |                 | d     | 0.0489  | -0.0208 | 0.1186  | 0.16    |      |         |
|      |                                                                                                                                                                                                                           |                 | z     | 13.9515 | 9.4685  | 18.4346 | <0.0001 |      |         |
|      |                                                                                                                                                                                                                           |                 | w     | 22.5795 | 13.8178 | 31.3411 | <0.0001 |      |         |
| ST9  | $\mu = \mu_{max} \times \left( 1 - \left( \frac{T - T_{opt}}{w/2} \right)^2 \right) \times (1 + a \times S)$                                                                                                              | Non-interactive | gmax  | 0.6942  | 0.6377  | 0.7508  | <0.0001 | 0.85 | -228.74 |
|      |                                                                                                                                                                                                                           |                 | a     | -0.0609 | -0.0696 | -0.0522 | <0.0001 |      |         |
|      |                                                                                                                                                                                                                           |                 | Topt  | 15.8302 | 15.3234 | 16.3371 | <0.0001 |      |         |
|      |                                                                                                                                                                                                                           |                 | w     | 19.1860 | 17.8537 | 20.5183 | <0.0001 |      |         |
| ST19 | $\mu = \mu_{max} \times e^{-k_T \times (T - T_{opt})^2} \times e^{-k_S \times (S - S_{opt})^2}$                                                                                                                           | Non-interactive | gmax  | 0.6490  | 0.5726  | 0.7254  | <0.0001 | 0.80 | -213.24 |
|      |                                                                                                                                                                                                                           |                 | Sopt  | 2.3113  | 0.4571  | 4.1654  | <0.05   |      |         |
|      |                                                                                                                                                                                                                           |                 | kS    | 0.0165  | 0.0022  | 0.0308  | <0.05   |      |         |
|      |                                                                                                                                                                                                                           |                 | Topt  | 15.6753 | 15.0242 | 16.3264 | <0.0001 |      |         |
|      |                                                                                                                                                                                                                           |                 | kT    | 0.0172  | 0.0123  | 0.0222  | <0.0001 |      |         |
| ST20 | $\mu = \mu_{max} \times e^{-k_T \times (T - T_{opt})^2} \times (1 + a \times S)$                                                                                                                                          | Non-interactive | gmax  | 0.7224  | 0.6421  | 0.8026  | <0.0001 | 0.79 | -212.62 |
|      |                                                                                                                                                                                                                           |                 | a     | -0.0617 | -0.0723 | -0.0512 | <0.0001 |      |         |
|      |                                                                                                                                                                                                                           |                 | Topt  | 15.6475 | 14.9979 | 16.2971 | <0.0001 |      |         |
|      |                                                                                                                                                                                                                           |                 | kT    | 0.0175  | 0.0125  | 0.0224  | <0.0001 |      |         |
| ST24 | $\mu = (\mu_{20} \times \theta^{T-20}) \times \frac{S_{tox}^2}{S_{tox}^2 + S^2}$                                                                                                                                          | Non-interactive | Stox  | 9.8855  | 4.2324  | 15.5387 | <0.005  | 0.38 | -161.19 |
|      |                                                                                                                                                                                                                           |                 | g20   | 0.3688  | 0.2828  | 0.4548  | <0.0001 |      |         |
|      |                                                                                                                                                                                                                           |                 | theta | 0.9622  | 0.9341  | 0.9903  | <0.0001 |      |         |
| ST25 | $\mu = (\mu_{20} \times \theta^{T-20}) \times e^{-k_S \times (S - S_{opt})^2}$                                                                                                                                            | Non-interactive | Sopt  | 3.0271  | 0.6310  | 5.4232  | <0.05   | 0.42 | -162.80 |
|      |                                                                                                                                                                                                                           |                 | kS    | 0.0179  | -0.0070 | 0.0428  | 0.15    |      |         |
|      |                                                                                                                                                                                                                           |                 | g20   | 0.3728  | 0.2813  | 0.4644  | <0.0001 |      |         |
|      |                                                                                                                                                                                                                           |                 | theta | 0.9634  | 0.9360  | 0.9907  | <0.0001 |      |         |
| ST26 | $\mu = \mu_{max} \times \begin{cases} e^{-k_{T1} \times (T - T_{opt})^2} & \text{for } T \leq T_{opt} \\ e^{-k_{T2} \times (T - T_{opt})^2} & \text{for } T > T_{opt} \end{cases} \times e^{-k_S \times (S - S_{opt})^2}$ | Non-interactive | gmax  | 0.6255  | 0.5527  | 0.6983  | <0.0001 | 0.86 | -229.82 |
|      |                                                                                                                                                                                                                           |                 | Sopt  | 2.1278  | 0.2915  | 3.9642  | <0.05   |      |         |
|      |                                                                                                                                                                                                                           |                 | kS    | 0.0143  | 0.0035  | 0.0252  | <0.05   |      |         |
|      |                                                                                                                                                                                                                           |                 | Topt  | 18.3656 | 17.3358 | 19.3954 | <0.0001 |      |         |
|      |                                                                                                                                                                                                                           |                 | kT1   | 0.0062  | 0.0025  | 0.0100  | <0.005  |      |         |
|      |                                                                                                                                                                                                                           |                 | kT2   | 0.0595  | 0.0155  | 0.1035  | <0.01   |      |         |
| ST46 |                                                                                                                                                                                                                           |                 | gmax  | 0.6255  | 0.5527  | 0.6983  | <0.0001 | 0.86 | -229.82 |

|      |                                                                                                                                                                                                                                                                                                                           |                 |       |          |           |         |         |      |         |
|------|---------------------------------------------------------------------------------------------------------------------------------------------------------------------------------------------------------------------------------------------------------------------------------------------------------------------------|-----------------|-------|----------|-----------|---------|---------|------|---------|
|      | $\mu = \mu_{max} \times \begin{cases} e^{-2.3 \times \left( \frac{T-T_{opt}}{T_{low}-T_{opt}} \right)^2} & \text{for } T \leq T_{opt} \\ e^{-2.3 \times \left( \frac{T-T_{opt}}{T_{high}-T_{opt}} \right)^2} & \text{for } T > T_{opt} \end{cases} \times e^{-k_S \times (S-S_{opt})^2}$                                  | Non-interactive | Sopt  | 2.1278   | 0.2913    | 3.9642  | <0.05   |      |         |
|      |                                                                                                                                                                                                                                                                                                                           |                 | kS    | 0.0143   | 0.0035    | 0.0252  | <0.05   |      |         |
|      |                                                                                                                                                                                                                                                                                                                           |                 | Topt  | 18.3656  | 17.3358   | 19.3954 | <0.0001 |      |         |
|      |                                                                                                                                                                                                                                                                                                                           |                 | Tlow  | -0.8214  | -5.9783   | 4.3355  | 0.75    |      |         |
|      |                                                                                                                                                                                                                                                                                                                           |                 | Thigh | 24.5823  | 22.9018   | 26.2627 | <0.0001 |      |         |
| ST47 | $\mu = \mu_{max} \times \begin{cases} e^{-k_{T1} \times (T-T_{opt})^2} & \text{for } T \leq T_{opt} \\ e^{-k_{T2} \times (T-T_{opt})^2} & \text{for } T > T_{opt} \end{cases} \times \frac{S_{tox}^2}{S_{tox}^2 + S^2}$                                                                                                   | Non-interactive | gmax  | 0.6468   | 0.5574    | 0.7363  | <0.0001 | 0.82 | -218.52 |
|      |                                                                                                                                                                                                                                                                                                                           |                 | Stox  | 9.0106   | 6.6543    | 11.3668 | <0.0001 |      |         |
|      |                                                                                                                                                                                                                                                                                                                           |                 | Topt  | 18.3902  | 17.2218   | 19.5587 | <0.0001 |      |         |
|      |                                                                                                                                                                                                                                                                                                                           |                 | kT1   | 0.0061   | 0.0019    | 0.0103  | <0.01   |      |         |
|      |                                                                                                                                                                                                                                                                                                                           |                 | kT2   | 0.0617   | 0.0080    | 0.1154  | <0.05   |      |         |
| ST48 | $\mu = \mu_{max} \times e^{-k_T \times (T-T_{opt})^2} \times \frac{S_{tox}^2}{S_{tox}^2 + S^2}$                                                                                                                                                                                                                           | Non-interactive | gmax  | 0.6681   | 0.5803    | 0.7559  | <0.0001 | 0.76 | -205.29 |
|      |                                                                                                                                                                                                                                                                                                                           |                 | Stox  | 8.8514   | 6.1899    | 11.5128 | <0.0001 |      |         |
|      |                                                                                                                                                                                                                                                                                                                           |                 | Topt  | 15.6228  | 14.9097   | 16.3360 | <0.0001 |      |         |
|      |                                                                                                                                                                                                                                                                                                                           |                 | kT    | 0.0173   | 0.0119    | 0.0226  | <0.0001 |      |         |
| ST49 | $\mu = \mu_{max} \times \begin{cases} e^{-k_{T1} \times (T-T_{opt})^2} & \text{for } T \leq T_{opt} \\ e^{-k_{T2} \times (T-T_{opt})^2} & \text{for } T > T_{opt} \end{cases} \times (1 + a \times S)$                                                                                                                    | Non-interactive | gmax  | 0.6984   | 0.6182    | 0.7786  | <0.0001 | 0.86 | -229.79 |
|      |                                                                                                                                                                                                                                                                                                                           |                 | a     | -0.0604  | -0.0688   | -0.0519 | <0.0001 |      |         |
|      |                                                                                                                                                                                                                                                                                                                           |                 | Topt  | 18.4222  | 17.3974   | 19.4470 | <0.0001 |      |         |
|      |                                                                                                                                                                                                                                                                                                                           |                 | kT1   | 0.0633   | 0.0140    | 0.1126  | <0.05   |      |         |
|      |                                                                                                                                                                                                                                                                                                                           |                 | kT2   | 0.0062   | 0.0025    | 0.0099  | <0.005  |      |         |
| ST50 | $\mu = \mu_{max} \times \begin{cases} e^{-2.3 \times \left( \frac{T-T_{opt}}{T_{low}-T_{opt}} \right)^2} & \text{for } T \leq T_{opt} \\ e^{-2.3 \times \left( \frac{T-T_{opt}}{T_{high}-T_{opt}} \right)^2} & \text{for } T > T_{opt} \end{cases} \times \frac{S_{tox}^2}{S_{tox}^2 + S^2}$                              | Non-interactive | gmax  | 0.6468   | 0.5574    | 0.7363  | <0.0001 | 0.82 | -218.52 |
|      |                                                                                                                                                                                                                                                                                                                           |                 | Stox  | 9.0106   | 6.6543    | 11.3668 | <0.0001 |      |         |
|      |                                                                                                                                                                                                                                                                                                                           |                 | Topt  | 18.3902  | 17.2218   | 19.5587 | <0.0001 |      |         |
|      |                                                                                                                                                                                                                                                                                                                           |                 | Tlow  | -0.9866  | -6.9257   | 4.9524  | 0.74    |      |         |
|      |                                                                                                                                                                                                                                                                                                                           |                 | Thigh | 24.4958  | 22.5474   | 26.4441 | <0.0001 |      |         |
| ST51 | $\mu = \mu_{max} \times \begin{cases} e^{-2.3 \times \left( \frac{T-T_{opt}}{T_{low} \times (1+a_{ST} \times S) - T_{opt}} \right)^2} & \text{for } T \leq T_{opt} \\ e^{-2.3 \times \left( \frac{T-T_{opt}}{T_{high}-T_{opt}} \right)^2} & \text{for } T > T_{opt} \end{cases} \times \frac{S_{tox}^2}{S_{tox}^2 + S^2}$ | Interactive     | gmax  | 0.5731   | 0.4944    | 0.6519  | <0.0001 | 0.80 | -211.67 |
|      |                                                                                                                                                                                                                                                                                                                           |                 | Stox  | 9.1908   | 6.6570    | 11.7246 | <0.0001 |      |         |
|      |                                                                                                                                                                                                                                                                                                                           |                 | Topt  | 19.1177  | 17.4523   | 20.7831 | <0.0001 |      |         |
|      |                                                                                                                                                                                                                                                                                                                           |                 | Tlow  | -56.5669 | -105.6187 | -7.5151 | <0.05   |      |         |
|      |                                                                                                                                                                                                                                                                                                                           |                 | Thigh | 24.7317  | 22.7942   | 26.6692 | <0.0001 |      |         |
|      |                                                                                                                                                                                                                                                                                                                           |                 | aST   | -0.4243  | -0.4933   | -0.3553 | <0.0001 |      |         |
| ST52 |                                                                                                                                                                                                                                                                                                                           | Interactive     | gmax  | 0.6221   | 0.5370    | 0.7071  | <0.0001 | 0.83 | -219.61 |
|      |                                                                                                                                                                                                                                                                                                                           |                 | Stox  | 10.1490  | 6.9823    | 13.3156 | <0.0001 |      |         |

|   |                                                                                                                                                                                                                                                                                                                                   |                 |       |         |         |         |         |      |         |
|---|-----------------------------------------------------------------------------------------------------------------------------------------------------------------------------------------------------------------------------------------------------------------------------------------------------------------------------------|-----------------|-------|---------|---------|---------|---------|------|---------|
|   | $\mu = \mu_{max} \times \begin{cases} e^{-2.3 \times \left( \frac{T - T_{opt}}{T_{low} - T_{opt}} \right)^2} & \text{for } T \leq T_{opt} \\ e^{-2.3 \times \left( \frac{T - T_{opt}}{T_{high} \times (1 + a_{ST} \times S) - T_{opt}} \right)^2} & \text{for } T > T_{opt} \end{cases} \times \frac{S_{tox}^2}{S_{tox}^2 + S^2}$ |                 | Topt  | 18.7591 | 17.6079 | 19.9102 | <0.0001 |      |         |
|   |                                                                                                                                                                                                                                                                                                                                   |                 | Tlow  | -2.1924 | -9.0213 | 4.6365  | 0.52    |      |         |
|   |                                                                                                                                                                                                                                                                                                                                   |                 | Thigh | 25.1020 | 23.0000 | 27.2041 | <0.0001 |      |         |
|   |                                                                                                                                                                                                                                                                                                                                   |                 | aST   | -0.0114 | -0.0224 | -0.0004 | <0.05   |      |         |
| 4 | $\mu = a + b_1 \times S + c_1 \times T + b_2 \times S^2 + c_2 \times T^2$                                                                                                                                                                                                                                                         | Non-interactive | a     | -0.8217 | -1.1482 | -0.4953 | <0.0001 | 0.84 | -224.10 |
|   |                                                                                                                                                                                                                                                                                                                                   |                 | b1    | -0.0116 | -0.0300 | 0.0069  | 0.21    |      |         |
|   |                                                                                                                                                                                                                                                                                                                                   |                 | c1    | 0.1821  | 0.1419  | 0.2222  | <0.0001 |      |         |
|   |                                                                                                                                                                                                                                                                                                                                   |                 | b2    | -0.0013 | -0.0024 | -0.0002 | <0.02   |      |         |
|   |                                                                                                                                                                                                                                                                                                                                   |                 | c2    | -0.0058 | -0.0069 | -0.0046 | <0.0001 |      |         |
| 5 | $\mu = a + b_1 \times S + c_1 \times T + b_2 \times S^2 + c_2 \times T^2 + d \times S \times T$                                                                                                                                                                                                                                   | Interactive     | a     | -0.7817 | -1.1260 | -0.4373 | <0.0001 | 0.84 | -222.78 |
|   |                                                                                                                                                                                                                                                                                                                                   |                 | b1    | -0.0205 | -0.0502 | 0.0092  | 0.17    |      |         |
|   |                                                                                                                                                                                                                                                                                                                                   |                 | c1    | 0.1793  | 0.1382  | 0.2203  | <0.0001 |      |         |
|   |                                                                                                                                                                                                                                                                                                                                   |                 | b2    | -0.0013 | -0.0025 | -0.0002 | <0.05   |      |         |
|   |                                                                                                                                                                                                                                                                                                                                   |                 | c2    | -0.0058 | -0.0069 | -0.0046 | <0.0001 |      |         |
|   |                                                                                                                                                                                                                                                                                                                                   |                 | d     | 0.0005  | -0.0009 | 0.0020  | 0.44    |      |         |

## References

58. Collins, C.D.; Boylen, C.W. Physiological responses of *Anabaena variabilis* (Cyanophyceae) to instantaneous exposure to various combinations of light intensity and temperature. *J. Phycol.* **1982**, *18*, 206–211.
59. Arrigo, K.R.; Sullivan, C.W. A high resolution bio-optical model of microalgal growth: tests using sea-ice algal community time-series data. *Limnol. Oceanogr.* **1994**, *39*, 609–631.
60. Moisan, J.R.; Moisan, T.A.; Abbott, M.R. Modelling the effect of temperature on the maximum growth rates of phytoplankton populations. *Ecol. Model.* **2002**, *153*, 197–215.
61. Montagnes, D.J.S.; Kimmance, S.A.; Atkinson, D. Using Q<sub>10</sub>: Can growth rates increase linearly with temperature? *Aquat. Microb. Ecol.* **2003**, *32*, 307–313.
62. Haario, H.; Kalachev, L.; Laine, M. Reduced models of algae growth. *Bull. Mathe. Biol.* **2009**, *71*, 1626–1648.
63. Pegallapati, A.K.; Nirmalakhandan, N. Modeling algal growth in bubble columns under sparging with CO<sub>2</sub>-enriched air. *Bioresour. Technol.* **2012**, *124*, 137–145.
64. Ketheesan, B.; Nirmalakhandan, N. Modeling microalgal growth in an airlift-driven raceway reactor. *Bioresour. Technol.* **2013**, *136*, 689–696.
65. Bordel, S.; Guieysse, B.; Munoz, R. Mechanistic model for the reclamation of industrial wastewaters using algal-bacterial photobioreactors. *Environ. Sci. Technol.* **2009**, *43*, 3200–3207.
66. Bernhardt, J.R.; Sunday, J.M.; Thompson, P.L.; O'Connor, M.I. Nonlinear averaging of thermal experience predicts population growth rates in a thermally variable environment. *Proc. R. Soc. B.* **2018**, *285*, 20181076.
67. Thomas, M.K.; Kremer, C.T.; Klausmeier, C.A.; Litchman, E. A global pattern of thermal adaptation in marine phytoplankton. *Science* **2012**, *338*, 1085–1088.
68. Cossins, A.R.; Bowler, K. Temperature biology of animals. Chapman and Hall, New York, 1987.
69. James, S.C.; Janardhanam, V.; Hanson, D.T. Simulating pH effects in an algal growth hydrodynamics model. *J. Phycol.* **2013**, *49*, 608–615.
70. Cerco, C.F.; Cole, T. Three-dimensional eutrophication model of Chesapeake Bay. US Army Corps of Engineers, 1994.
71. Dauta, A.; Devaux, J.; Piquemal, F.; Boumnick, L. Growth rate of four freshwater algae in relation to light and temperature. *Hydrobiologia* **1990**, *207*, 221–226.
72. Martins, I.; Azevedo, A.; Gomez, I.; Valente, L.M.P. Variation on the standing stock of *Gracilaria* sp. In a temperature estuary under single-stressor and multiple-stressor climate change scenarios. *Algal Res.* **2020**, *51*, 102079.
73. Tevatia, R.; Demirel, Y.; Rudrappa, D.; Blum, P. Effects of thermodynamically coupled reaction diffusion in microalgae growth and lipid accumulation: Model development and stability analysis. *Comp. Chem. Engineer.* **2015**, *75*, 28–39.
74. Guterman, H.; Vonshak, A.; Ben-Yaakov, S. A macromodel for outdoor algal mass production. *Biotechnol. Bioeng.* **1990**, *35*, 809–819.
75. Chen, M.; Fan, M.; Liu, R.; Wang, X.; Yuan, X.; Zhu, H. The dynamics of temperature and light on the growth of phytoplankton. *J. Theor. Biol.* **2015**, *385*, 8–19.
76. Di Toro, D.M.; O'Connor, D.J.; Thomann, R.V. A dynamic model of the phytoplankton population in the sacramento-san joaquin delta. *Am. Chem. Soc.* **1971**, *106*, 131–180.
77. Ahlgren, G. Temperature functions in biology and their application to algal growth constants. *Oikos* **1987**, *49*, 177–190.
78. Blanchard, G.F.; Guarini, J.-M.; Richard, P.; Gros, Ph.; Mornet, F. Quantifying the short-term temperature effect on light-saturated photosynthesis of intertidal microphytobenthos. *Mar. Ecol. Prog. Ser.* **1996**, *134*, 309–313.
79. Slegers, P.M.; Loesing, M.B.; Wijffels, R.H.; van Straten, G.; van Boxtel, A.J.B. Scenario evaluation of open pond microalgae production. *Algal Res.* **2013**, *2*, 358–368.
80. Quinn, J.; de Winter, L.; Bradley, T. Microalgae bulk growth model with application to industrial scale systems. *Bioresour. Technol.* **2011**, *102*, 5083–5092.
81. Geider, R.J.; MacIntyre, H.L.; Kana, T.M. Dynamic model of phytoplankton growth and acclimation: responses of the balanced growth rate and the chlorophyll *a*:carbon ratio to light, nutrient-limitation and temperature. *Mar. Ecol. Prog. Ser.* **1997**, *148*, 187–200.
82. Wigmosta, M.S.; Coleman, A.M.; Skaggs, R.J.; Huesemann, M.H.; Lane, L.J. National microalgae biofuel production potential and resource demand. *Water Resour. Res.* **2011**, *47*, W00H04.
83. Kleiman, R.M.; Characklis, G.W.; Kern, J.D.; Gerlach, R. Characterizing weather-related biophysical and financial risks in algal biofuel production. *App. Energ.* **2021**, *294*, 116960.
